# Supplementary material for: Comment on “Circulating fatty acids and risk of severe non-alcoholic fatty liver disease in the UK biobank: a prospective cohort of 116 223 individuals” by P. Zhuang, Y. Ao, X. Liu, H. Ye, H. Li, X. Wan, Y. Zhang and J. Jiao, Food & Function , 2024, 15 , 10527
Source: Royal Society of Chemistry journal article supplement (doi:10.1039/d4fo05002a), 2025-01-01
Supplement: d4fo05002a1.xlsx [file d4fo05002a1.xlsx]

## Sheet: Table S1
Table S1. Details of the genome-wide association studies (GWAS) and datasets used in our analyses
Exposure/Outcome name	GWAS_ID	PMID	Sample size
Monounsaturated fatty acid levels	ebi-a-GCST90092928	35213538	115006
Omega-3 fatty acid levels	ebi-a-GCST90092931	35213538	115006
Omega-6 fatty acid levels	ebi-a-GCST90092933	35213538	115006
Polyunsaturated fatty acid levels	ebi-a-GCST90092939	35213538	115006
Ratio of docosahexaenoic acid to total fatty acid levels	ebi-a-GCST90092817	35213538	115006
Ratio of linoleic acid to total fatty acids	ebi-a-GCST90092881	35213538	115006
Ratio of monounsaturated fatty acids to total fatty acids	ebi-a-GCST90092929	35213538	115006
Ratio of omega-3 fatty acids to total fatty acids	ebi-a-GCST90092932	35213538	115006
Ratio of omega-6 fatty acids to omega-3 fatty acids	ebi-a-GCST90092934	35213538	115006
Ratio of omega-6 fatty acids to total fatty acids	ebi-a-GCST90092935	35213538	115006
Ratio of polyunsaturated fatty acids to monounsaturated fatty acids	ebi-a-GCST90092940	35213538	115006
Ratio of polyunsaturated fatty acids to total fatty acids	ebi-a-GCST90092941	35213538	115006
Ratio of saturated fatty acids to total fatty acids	ebi-a-GCST90092981	35213538	115006
Saturated fatty acid levels	ebi-a-GCST90092980	35213538	115006
Total fatty acid levels	ebi-a-GCST90092987	35213538	115006
Non-alcoholic fatty liver disease	ebi-a-GCST90091033	34841290	778614
GWAS genome-wide association studies, mRS modified Rankin Scale, PMID PubMed Identification, N Sample size

## Sheet: Table S2
Table S2. Single nucleotide polymorphisms（SNPs) were used as instrumental variables(IVs) from fatty acids (FAs) and their composition ratios.
Inflammatory factors	GWAS_ID	SNP	Chr	Pos	EA	OA	beta	SE	EAF	p_value	Samplesize	R2	F
Monounsaturated fatty acid levels	ebi-a-GCST90092928	rs1002687	1	62963737	A	G	0.0914582	0.0042485	0.644739	8.70964e-103	115006	0.00401335	463.411
Monounsaturated fatty acid levels	ebi-a-GCST90092928	rs534417	1	23784965	G	A	0.0388228	0.00612967	0.875008	2.39999e-10	115006	0.00034868	40.1136
Monounsaturated fatty acid levels	ebi-a-GCST90092928	rs182050989	1	27262545	T	C	0.0694765	0.012311	0.02815	1.7e-08	115006	0.000276853	31.848
Monounsaturated fatty acid levels	ebi-a-GCST90092928	rs4846914	1	230295691	A	G	-0.0305214	0.00416166	0.605403	2.19989e-13	115006	0.000467468	53.7859
Monounsaturated fatty acid levels	ebi-a-GCST90092928	rs602633	1	109821511	G	T	0.0269222	0.00492268	0.782937	4.49997e-08	115006	0.000260007	29.9096
Monounsaturated fatty acid levels	ebi-a-GCST90092928	rs60960031	2	21530659	A	G	-0.0261665	0.00415102	0.40287	2.90001e-10	115006	0.000345391	39.7351
Monounsaturated fatty acid levels	ebi-a-GCST90092928	rs1260326	2	27730940	C	T	-0.111017	0.00415484	0.604008	2.79898e-157	115006	0.00616967	713.942
Monounsaturated fatty acid levels	ebi-a-GCST90092928	rs11895352	2	20367135	T	C	-0.0260019	0.00408008	0.475391	1.89998e-10	115006	0.00035302	40.613
Monounsaturated fatty acid levels	ebi-a-GCST90092928	rs1128249	2	165528624	T	G	-0.0355909	0.00416487	0.39204	1.29987e-17	115006	0.000634569	73.0243
Monounsaturated fatty acid levels	ebi-a-GCST90092928	rs2943635	2	227077377	T	C	0.0263224	0.00435741	0.679825	1.5e-09	115006	0.000317202	36.4911
Monounsaturated fatty acid levels	ebi-a-GCST90092928	rs4564803	2	21205502	T	G	-0.0716528	0.00483413	0.22818	1.10002e-49	115006	0.00190669	219.696
Monounsaturated fatty acid levels	ebi-a-GCST90092928	rs1394092	3	136196071	T	C	0.0308858	0.00457557	0.726704	1.50003e-11	115006	0.000396036	45.5638
Monounsaturated fatty acid levels	ebi-a-GCST90092928	rs11940694	4	39414993	G	A	0.0252725	0.00418963	0.605096	1.6e-09	115006	0.000316291	36.3863
Monounsaturated fatty acid levels	ebi-a-GCST90092928	rs13108218	4	3443931	G	A	-0.0379084	0.00421058	0.615408	2.19989e-19	115006	0.000704305	81.0549
Monounsaturated fatty acid levels	ebi-a-GCST90092928	rs1471251	4	87976359	T	A	0.0300907	0.00417393	0.397122	5.60015e-13	115006	0.000451708	51.9717
Monounsaturated fatty acid levels	ebi-a-GCST90092928	rs2035816	4	100508556	G	A	-0.0412481	0.00733618	0.084302	1.89998e-08	115006	0.000274807	31.6126
Monounsaturated fatty acid levels	ebi-a-GCST90092928	rs12916	5	74656539	C	T	0.0228919	0.00415312	0.400366	3.50002e-08	115006	0.000264107	30.3814
Monounsaturated fatty acid levels	ebi-a-GCST90092928	rs4704834	5	156443066	G	A	0.0435104	0.00424371	0.644043	1.10002e-24	115006	0.000913224	105.12
Monounsaturated fatty acid levels	ebi-a-GCST90092928	rs11429307	5	55857025	GT	G	0.0431169	0.00518478	0.191495	9.09913e-17	115006	0.00060097	69.1555
Monounsaturated fatty acid levels	ebi-a-GCST90092928	rs6938550	6	20462138	A	G	-0.0416299	0.00725594	0.914146	9.59997e-09	115006	0.00028614	32.9167
Monounsaturated fatty acid levels	ebi-a-GCST90092928	rs117733303	6	160922870	G	A	-0.257737	0.0150735	0.018512	1.50003e-65	115006	0.00253573	292.36
Monounsaturated fatty acid levels	ebi-a-GCST90092928	rs9271573	6	32590501	C	A	0.0428694	0.00413639	0.593643	3.59998e-25	115006	0.000933095	107.41
Monounsaturated fatty acid levels	ebi-a-GCST90092928	rs12208357	6	160543148	T	C	0.052959	0.00799355	0.069994	3.50026e-11	115006	0.000381517	43.8927
Monounsaturated fatty acid levels	ebi-a-GCST90092928	rs28752924	6	31303922	C	T	0.0298078	0.00421669	0.445515	1.59993e-12	115006	0.000434318	49.97
Monounsaturated fatty acid levels	ebi-a-GCST90092928	rs1052248	6	31556581	A	T	0.0312364	0.00464902	0.257969	1.80011e-11	115006	0.000392381	45.1431
Monounsaturated fatty acid levels	ebi-a-GCST90092928	rs632057	6	139834012	G	T	-0.0313916	0.00420479	0.627772	8.30042e-14	115006	0.000484404	55.7353
Monounsaturated fatty acid levels	ebi-a-GCST90092928	rs10455872	6	161010118	G	A	-0.148375	0.0075343	0.078987	2.49977e-86	115006	0.00336088	387.818
Monounsaturated fatty acid levels	ebi-a-GCST90092928	rs6905288	6	43758873	A	G	0.0225611	0.00409377	0.568514	3.59998e-08	115006	0.000264021	30.3715
Monounsaturated fatty acid levels	ebi-a-GCST90092928	rs12212146	6	161125454	C	T	0.0486004	0.0079579	0.07432	1e-09	115006	0.000324206	37.2971
Monounsaturated fatty acid levels	ebi-a-GCST90092928	rs72555385	7	73123473	G	A	0.0608942	0.00944248	0.049314	1.09999e-10	115006	0.000361495	41.5884
Monounsaturated fatty acid levels	ebi-a-GCST90092928	rs2070971	7	44197583	T	G	0.0323992	0.00593066	0.137117	4.70002e-08	115006	0.000259435	29.8439
Monounsaturated fatty acid levels	ebi-a-GCST90092928	rs56001710	7	25983400	T	A	-0.0268641	0.00425024	0.58059	2.59998e-10	115006	0.000347253	39.9494
Monounsaturated fatty acid levels	ebi-a-GCST90092928	rs3812316	7	73020337	G	C	-0.113417	0.00605828	0.129276	3.29989e-78	115006	0.0030382	350.469
Monounsaturated fatty acid levels	ebi-a-GCST90092928	rs328	8	19819724	G	C	-0.144553	0.00674923	0.100282	9.2045e-102	115006	0.0039728	458.71
Monounsaturated fatty acid levels	ebi-a-GCST90092928	rs1561748	8	19733244	C	G	-0.0478427	0.00495775	0.267445	4.90004e-22	115006	0.000809077	93.1225
Monounsaturated fatty acid levels	ebi-a-GCST90092928	rs2721961	8	116657911	G	T	-0.0258897	0.00453049	0.280836	1.09999e-08	115006	0.00028387	32.6555
Monounsaturated fatty acid levels	ebi-a-GCST90092928	rs28601761	8	126500031	G	C	-0.0893291	0.00416688	0.420103	5.90201e-102	115006	0.00398026	459.575
Monounsaturated fatty acid levels	ebi-a-GCST90092928	rs615632	8	9796321	T	C	0.032758	0.00409114	0.532027	1.20005e-15	115006	0.000557165	64.1119
Monounsaturated fatty acid levels	ebi-a-GCST90092928	rs1993453	8	59347184	G	A	-0.02592	0.00430541	0.663073	1.7e-09	115006	0.000315053	36.2438
Monounsaturated fatty acid levels	ebi-a-GCST90092928	rs2740488	9	107661742	C	A	-0.0279599	0.00461953	0.265318	1.40001e-09	115006	0.000318432	36.6326
Monounsaturated fatty acid levels	ebi-a-GCST90092928	rs35166446	10	94533176	GT	G	-0.0226215	0.0041058	0.469097	3.59998e-08	115006	0.000263883	30.3557
Monounsaturated fatty acid levels	ebi-a-GCST90092928	rs526748	10	99772373	T	G	0.0252409	0.00408852	0.554382	6.69993e-10	115006	0.000331294	38.1127
Monounsaturated fatty acid levels	ebi-a-GCST90092928	rs10761716	10	64882300	G	C	-0.0308576	0.00409989	0.441489	5.19996e-14	115006	0.000492318	56.6464
Monounsaturated fatty acid levels	ebi-a-GCST90092928	rs4963506	11	62187666	A	G	0.0283401	0.00513448	0.19572	3.40001e-08	115006	0.000264834	30.4651
Monounsaturated fatty acid levels	ebi-a-GCST90092928	rs964184	11	116648917	C	G	-0.205217	0.00599383	0.867233	1e-200	115006	0.01009	1172.22
Monounsaturated fatty acid levels	ebi-a-GCST90092928	rs1047964	11	117156893	T	G	-0.17498	0.0206924	0.010066	2.80027e-17	115006	0.000621391	71.5068
Monounsaturated fatty acid levels	ebi-a-GCST90092928	rs141469619	11	116714293	G	A	0.245646	0.0214883	0.010139	2.90001e-30	115006	0.00113501	130.68
Monounsaturated fatty acid levels	ebi-a-GCST90092928	rs174564	11	61588305	G	A	0.0640584	0.0042621	0.347009	4.70002e-51	115006	0.00196034	225.89
Monounsaturated fatty acid levels	ebi-a-GCST90092928	rs7973253	12	109878115	G	A	0.0262014	0.00422845	0.367262	5.80003e-10	115006	0.00033375	38.3954
Monounsaturated fatty acid levels	ebi-a-GCST90092928	rs76895963	12	4384844	G	T	-0.0905878	0.0158259	0.020559	1e-08	115006	0.000284812	32.7639
Monounsaturated fatty acid levels	ebi-a-GCST90092928	rs67981690	12	21343886	G	A	0.0352695	0.0060985	0.129099	7.29995e-09	115006	0.000290741	33.4461
Monounsaturated fatty acid levels	ebi-a-GCST90092928	rs7140110	13	114544024	C	T	0.0308525	0.00444456	0.299398	3.90032e-12	115006	0.000418814	48.1854
Monounsaturated fatty acid levels	ebi-a-GCST90092928	rs149014710	13	114756556	T	C	-0.0247891	0.00450312	0.430649	3.69999e-08	115006	0.000263427	30.3031
Monounsaturated fatty acid levels	ebi-a-GCST90092928	rs261290	15	58678720	C	T	-0.0732738	0.0042887	0.654648	1.9002e-65	115006	0.00253177	291.903
Monounsaturated fatty acid levels	ebi-a-GCST90092928	rs150844304	15	43726625	C	A	0.123444	0.0128702	0.025675	8.69961e-22	115006	0.000799285	91.9945
Monounsaturated fatty acid levels	ebi-a-GCST90092928	rs633695	15	58725839	G	A	0.0561391	0.00448995	0.292334	7.19946e-36	115006	0.00135749	156.329
Monounsaturated fatty acid levels	ebi-a-GCST90092928	rs2000999	16	72108093	A	G	0.0298539	0.00519643	0.188603	9.20005e-09	115006	0.000286911	33.0054
Monounsaturated fatty acid levels	ebi-a-GCST90092928	rs3198697	16	15129940	T	C	-0.0266243	0.00414239	0.406701	1.29999e-10	115006	0.000359069	41.3092
Monounsaturated fatty acid levels	ebi-a-GCST90092928	rs9910747	17	17433959	C	A	0.0465726	0.00842915	0.062203	3.29997e-08	115006	0.000265374	30.5271
Monounsaturated fatty acid levels	ebi-a-GCST90092928	rs77697917	17	41840849	T	C	0.0671205	0.0121727	0.02872	3.50002e-08	115006	0.000264302	30.4039
Monounsaturated fatty acid levels	ebi-a-GCST90092928	rs12601919	17	65825374	G	A	0.0295034	0.0052154	0.188889	1.5e-08	115006	0.000278181	32.0008
Monounsaturated fatty acid levels	ebi-a-GCST90092928	rs1540037	18	47182664	G	A	0.0334693	0.00501538	0.778329	2.49977e-11	115006	0.000387077	44.5326
Monounsaturated fatty acid levels	ebi-a-GCST90092928	rs149615216	18	47106028	T	C	0.165886	0.0197482	0.010798	4.49987e-17	115006	0.000613165	70.5597
Monounsaturated fatty acid levels	ebi-a-GCST90092928	rs142385484	19	50016759	T	C	-0.0354607	0.00580741	0.147429	1e-09	115006	0.000324092	37.284
Monounsaturated fatty acid levels	ebi-a-GCST90092928	rs116843064	19	8429323	A	G	-0.162005	0.0145897	0.01986	1.20005e-28	115006	0.00107097	123.298
Monounsaturated fatty acid levels	ebi-a-GCST90092928	rs8107974	19	19388500	T	A	-0.11801	0.00771236	0.075532	7.50067e-53	115006	0.0020317	234.129
Monounsaturated fatty acid levels	ebi-a-GCST90092928	rs5112	19	45430280	G	C	0.080703	0.004375	0.533721	5.60015e-76	115006	0.00294998	340.264
Monounsaturated fatty acid levels	ebi-a-GCST90092928	rs739320	19	49261368	C	T	-0.0278563	0.00425974	0.606658	6.20012e-11	115006	0.000371705	42.7635
Monounsaturated fatty acid levels	ebi-a-GCST90092928	rs157592	19	45424514	C	A	0.0533722	0.00536756	0.185273	2.70023e-23	115006	0.000858979	98.871
Monounsaturated fatty acid levels	ebi-a-GCST90092928	rs117188729	19	8415076	A	T	-0.0674619	0.011854	0.03129	1.29999e-08	115006	0.000281543	32.3877
Monounsaturated fatty acid levels	ebi-a-GCST90092928	rs182611493	19	19458388	G	A	-0.147423	0.0195931	0.012519	5.30029e-14	115006	0.000492028	56.6131
Monounsaturated fatty acid levels	ebi-a-GCST90092928	rs7679	20	44576502	C	T	0.0367199	0.00523526	0.186416	2.29985e-12	115006	0.000427583	49.1948
Omega-3 fatty acid levels	ebi-a-GCST90092931	rs660240	1	109817838	C	T	0.0370395	0.00481655	0.784707	1.50003e-14	115006	0.000513942	59.1358
Omega-3 fatty acid levels	ebi-a-GCST90092931	rs12037485	1	2332391	T	C	0.0222781	0.00396786	0.460471	2e-08	115006	0.000274034	31.5236
Omega-3 fatty acid levels	ebi-a-GCST90092931	rs583609	1	62916796	C	T	-0.0711993	0.00414084	0.352508	2.90001e-66	115006	0.00256412	295.643
Omega-3 fatty acid levels	ebi-a-GCST90092931	rs6547409	2	21190209	T	C	-0.0565011	0.0090697	0.051259	4.70002e-10	115006	0.000337335	38.8079
Omega-3 fatty acid levels	ebi-a-GCST90092931	rs11681659	2	136820960	T	C	-0.0264162	0.00436662	0.716465	1.5e-09	115006	0.00031812	36.5967
Omega-3 fatty acid levels	ebi-a-GCST90092931	rs312939	2	21409548	A	G	0.034251	0.00458283	0.752467	7.8001e-14	115006	0.000485454	55.8562
Omega-3 fatty acid levels	ebi-a-GCST90092931	rs1260326	2	27730940	C	T	-0.0830756	0.00404264	0.604008	7.70016e-94	115006	0.00365851	422.289
Omega-3 fatty acid levels	ebi-a-GCST90092931	rs4860987	4	69491284	T	A	0.0450329	0.00478075	0.258612	4.49987e-21	115006	0.000770925	88.7279
Omega-3 fatty acid levels	ebi-a-GCST90092931	rs11242109	5	131677047	T	G	0.0234291	0.00395796	0.479035	3.2e-09	115006	0.00030459	35.0397
Omega-3 fatty acid levels	ebi-a-GCST90092931	rs6882345	5	156397673	A	G	0.0274277	0.00409997	0.63285	2.19989e-11	115006	0.000388981	44.7517
Omega-3 fatty acid levels	ebi-a-GCST90092931	rs2247056	6	31265490	C	T	0.0356403	0.00432842	0.703307	1.80011e-16	115006	0.000589179	67.7979
Omega-3 fatty acid levels	ebi-a-GCST90092931	rs10455872	6	161010118	G	A	-0.0617415	0.00733401	0.078987	3.80014e-17	115006	0.000615862	70.8702
Omega-3 fatty acid levels	ebi-a-GCST90092931	rs117733303	6	160922870	G	A	-0.110595	0.0146728	0.018512	4.79954e-14	115006	0.000493753	56.8117
Omega-3 fatty acid levels	ebi-a-GCST90092931	rs9273217	6	32613747	G	T	-0.0245669	0.00448023	0.318014	4.20001e-08	115006	0.000261376	30.0672
Omega-3 fatty acid levels	ebi-a-GCST90092931	rs4000713	7	25990597	A	G	-0.028225	0.0043421	0.295416	8.00018e-11	115006	0.000367272	42.2533
Omega-3 fatty acid levels	ebi-a-GCST90092931	rs62466318	7	73042085	T	C	-0.0716979	0.00492892	0.204201	6.20012e-48	115006	0.0018365	211.593
Omega-3 fatty acid levels	ebi-a-GCST90092931	rs112875651	8	126506694	A	G	-0.0874051	0.00410836	0.392337	1.9002e-100	115006	0.00392022	452.615
Omega-3 fatty acid levels	ebi-a-GCST90092931	rs9987289	8	9183358	G	A	0.0544031	0.00688493	0.909161	2.70023e-15	115006	0.000542615	62.4368
Omega-3 fatty acid levels	ebi-a-GCST90092931	rs10096633	8	19830921	T	C	-0.0418412	0.00599603	0.123902	2.99985e-12	115006	0.00042323	48.6937
Omega-3 fatty acid levels	ebi-a-GCST90092931	rs1800978	9	107665978	G	C	-0.0387593	0.00603019	0.123988	1.29999e-10	115006	0.000359098	41.3126
Omega-3 fatty acid levels	ebi-a-GCST90092931	rs3039101	10	5246177	TGTA	T	-0.0352443	0.00550396	0.153601	1.5e-10	115006	0.000356412	41.0034
Omega-3 fatty acid levels	ebi-a-GCST90092931	rs7924036	10	65191645	T	G	0.0222276	0.0039569	0.504218	1.89998e-08	115006	0.000274306	31.5549
Omega-3 fatty acid levels	ebi-a-GCST90092931	rs55891451	10	96728169	C	A	0.033166	0.00494622	0.20172	1.99986e-11	115006	0.000390795	44.9606
Omega-3 fatty acid levels	ebi-a-GCST90092931	rs145786300	11	61406089	A	G	-0.150855	0.0187118	0.011993	7.50067e-16	115006	0.000564836	64.9951
Omega-3 fatty acid levels	ebi-a-GCST90092931	rs143355652	11	61453822	T	C	-0.153201	0.0198593	0.010466	1.20005e-14	115006	0.00051719	59.5097
Omega-3 fatty acid levels	ebi-a-GCST90092931	rs12226389	11	61823630	C	T	-0.0535751	0.00510749	0.185805	9.70063e-26	115006	0.000955818	110.028
Omega-3 fatty acid levels	ebi-a-GCST90092931	rs2232143	11	60899701	C	T	0.104052	0.0141105	0.021879	1.69981e-13	115006	0.000472596	54.3762
Omega-3 fatty acid levels	ebi-a-GCST90092931	rs174564	11	61588305	G	A	-0.336931	0.00412782	0.347009	1e-200	115006	0.0547598	6662.43
Omega-3 fatty acid levels	ebi-a-GCST90092931	rs964184	11	116648917	C	G	-0.117565	0.005805	0.867233	3.40017e-91	115006	0.00355373	410.151
Omega-3 fatty acid levels	ebi-a-GCST90092931	rs145659493	11	61850279	A	C	0.107728	0.0158266	0.015853	1e-11	115006	0.000402705	46.3313
Omega-3 fatty acid levels	ebi-a-GCST90092931	rs149820547	11	61983775	G	T	-0.0678421	0.00988147	0.042105	6.59933e-12	115006	0.000409692	47.1355
Omega-3 fatty acid levels	ebi-a-GCST90092931	rs141469619	11	116714293	G	A	0.117162	0.0208113	0.010139	1.79999e-08	115006	0.000275508	31.6933
Omega-3 fatty acid levels	ebi-a-GCST90092931	rs78689694	11	126234820	C	G	0.0326453	0.00581875	0.133362	2e-08	115006	0.000273617	31.4756
Omega-3 fatty acid levels	ebi-a-GCST90092931	rs11230829	11	61701898	G	A	-0.103943	0.0144233	0.027785	5.70033e-13	115006	0.000451382	51.9342
Omega-3 fatty acid levels	ebi-a-GCST90092931	rs673335	11	75450576	C	T	-0.0684035	0.00539262	0.159752	7.19946e-37	115006	0.00139711	160.898
Omega-3 fatty acid levels	ebi-a-GCST90092931	rs7970695	12	121423376	A	G	-0.0235143	0.0040847	0.620564	8.60003e-09	115006	0.00028807	33.1388
Omega-3 fatty acid levels	ebi-a-GCST90092931	rs6602911	13	114547372	T	C	0.0231802	0.00412043	0.360074	1.79999e-08	115006	0.000275112	31.6477
Omega-3 fatty acid levels	ebi-a-GCST90092931	rs139974673	15	44027885	C	T	0.118563	0.0124678	0.025916	1.9002e-21	115006	0.0007857	90.4297
Omega-3 fatty acid levels	ebi-a-GCST90092931	rs261290	15	58678720	C	T	-0.112905	0.00416818	0.654648	1.39959e-161	115006	0.00633944	733.712
Omega-3 fatty acid levels	ebi-a-GCST90092931	rs633695	15	58725839	G	A	0.0848151	0.00436378	0.292334	3.80014e-84	115006	0.00327398	377.758
Omega-3 fatty acid levels	ebi-a-GCST90092931	rs34663616	15	58569330	A	C	0.035253	0.00586293	0.137651	1.79999e-09	115006	0.000314272	36.1539
Omega-3 fatty acid levels	ebi-a-GCST90092931	rs72789541	16	15127534	A	T	-0.0834033	0.00434225	0.295973	3.19963e-82	115006	0.00319761	368.918
Omega-3 fatty acid levels	ebi-a-GCST90092931	rs35390787	16	15678414	CA	C	0.0223258	0.00407642	0.438254	4.30002e-08	115006	0.000260749	29.995
Omega-3 fatty acid levels	ebi-a-GCST90092931	rs16940904	17	44186063	T	C	-0.0345078	0.00474779	0.226566	3.59998e-13	115006	0.000459126	52.8255
Omega-3 fatty acid levels	ebi-a-GCST90092931	rs77960347	18	47109955	G	A	0.157178	0.0172904	0.013234	9.8992e-20	115006	0.000718027	82.6354
Omega-3 fatty acid levels	ebi-a-GCST90092931	rs2187375	18	47172283	G	A	0.0524746	0.00518371	0.822879	4.40048e-24	115006	0.000890245	102.473
Omega-3 fatty acid levels	ebi-a-GCST90092931	rs12957708	18	47284353	G	A	0.0311923	0.00568503	0.14228	4.09996e-08	115006	0.000261695	30.1038
Omega-3 fatty acid levels	ebi-a-GCST90092931	rs737338	19	11347657	T	C	-0.0674466	0.0107428	0.035184	3.40001e-10	115006	0.000342622	39.4165
Omega-3 fatty acid levels	ebi-a-GCST90092931	rs58542926	19	19379549	T	C	-0.172929	0.00754654	0.074379	3.3037e-116	115006	0.00454507	525.088
Omega-3 fatty acid levels	ebi-a-GCST90092931	rs157592	19	45424514	C	A	0.0325574	0.00522115	0.185273	4.49997e-10	115006	0.000337987	38.883
Omega-3 fatty acid levels	ebi-a-GCST90092931	rs5112	19	45430280	G	C	0.0495704	0.00425566	0.533721	2.29985e-31	115006	0.00117836	135.676
Omega-3 fatty acid levels	ebi-a-GCST90092931	rs2288912	19	45449199	G	C	0.026507	0.00396428	0.496385	2.29985e-11	115006	0.0003886	44.708
Omega-3 fatty acid levels	ebi-a-GCST90092931	rs182611493	19	19458388	G	A	-0.220029	0.0190586	0.012519	7.8001e-31	115006	0.00115759	133.282
Omega-3 fatty acid levels	ebi-a-GCST90092931	rs6129624	20	39167592	A	G	-0.0242913	0.0042636	0.335232	1.2e-08	115006	0.000282167	32.4594
Omega-3 fatty acid levels	ebi-a-GCST90092931	rs117143374	21	40555561	C	T	-0.03454	0.00569242	0.14225	1.29999e-09	115006	0.00032003	36.8166
Omega-6 fatty acid levels	ebi-a-GCST90092933	rs534417	1	23784965	G	A	0.0391707	0.00607383	0.875008	1.09999e-10	115006	0.00036151	41.5901
Omega-6 fatty acid levels	ebi-a-GCST90092933	rs2986164	1	25622291	A	G	-0.0247791	0.00440639	0.535868	1.89998e-08	115006	0.000274894	31.6226
Omega-6 fatty acid levels	ebi-a-GCST90092933	rs34232196	1	55489542	T	C	-0.0327764	0.00471815	0.245336	3.69999e-12	115006	0.000419446	48.2582
Omega-6 fatty acid levels	ebi-a-GCST90092933	rs1002687	1	62963737	A	G	0.0917563	0.0042098	0.644739	2.50035e-105	115006	0.00411375	475.052
Omega-6 fatty acid levels	ebi-a-GCST90092933	rs602633	1	109821511	G	T	0.0573983	0.00487783	0.782937	5.79963e-32	115006	0.00120255	138.464
Omega-6 fatty acid levels	ebi-a-GCST90092933	rs496654	1	234851165	C	A	0.0302882	0.00403175	0.517238	5.79963e-14	115006	0.000490486	56.4355
Omega-6 fatty acid levels	ebi-a-GCST90092933	rs870526	2	20369562	T	C	-0.0320783	0.00403664	0.521425	1.9002e-15	115006	0.000548812	63.1503
Omega-6 fatty acid levels	ebi-a-GCST90092933	rs3770586	2	169828995	T	C	-0.0229768	0.00404862	0.48398	1.40001e-08	115006	0.000279977	32.2075
Omega-6 fatty acid levels	ebi-a-GCST90092933	rs1260326	2	27730940	C	T	-0.064724	0.00411907	0.604008	1.20005e-55	115006	0.0021423	246.902
Omega-6 fatty acid levels	ebi-a-GCST90092933	rs672889	2	21319016	G	T	0.0758525	0.00580072	0.860074	4.49987e-39	115006	0.0014846	170.989
Omega-6 fatty acid levels	ebi-a-GCST90092933	rs6547409	2	21190209	T	C	-0.0808582	0.00924119	0.051259	2.09991e-18	115006	0.000665247	76.557
Omega-6 fatty acid levels	ebi-a-GCST90092933	rs4299376	2	44072576	T	G	-0.0356946	0.00431655	0.676282	1.29987e-16	115006	0.000594228	68.3792
Omega-6 fatty acid levels	ebi-a-GCST90092933	rs4860948	4	69340991	A	T	0.0285942	0.00470392	0.244351	1.2e-09	115006	0.0003212	36.9512
Omega-6 fatty acid levels	ebi-a-GCST90092933	rs13108218	4	3443931	G	A	-0.035128	0.00417284	0.615408	3.80014e-17	115006	0.000615822	70.8657
Omega-6 fatty acid levels	ebi-a-GCST90092933	rs4704210	5	74635225	C	G	0.0463297	0.00416513	0.374206	9.70063e-29	115006	0.00107467	123.724
Omega-6 fatty acid levels	ebi-a-GCST90092933	rs7707394	5	74472939	A	G	0.0294421	0.00419959	0.357102	2.39994e-12	115006	0.000427187	49.1492
Omega-6 fatty acid levels	ebi-a-GCST90092933	rs6882345	5	156397673	A	G	0.0441725	0.00417626	0.63285	3.80014e-26	115006	0.000971821	111.872
Omega-6 fatty acid levels	ebi-a-GCST90092933	rs28377109	6	32434716	A	C	0.0450439	0.00629445	0.116077	8.30042e-13	115006	0.000445085	51.2093
Omega-6 fatty acid levels	ebi-a-GCST90092933	rs9266229	6	31325323	G	C	0.027057	0.00413903	0.433975	6.29941e-11	115006	0.000371433	42.7321
Omega-6 fatty acid levels	ebi-a-GCST90092933	rs7750288	6	160400147	G	A	0.025103	0.00445908	0.285016	1.79999e-08	115006	0.000275499	31.6923
Omega-6 fatty acid levels	ebi-a-GCST90092933	rs6938647	6	160986915	C	A	-0.0478033	0.00494492	0.782332	4.19952e-22	115006	0.00081194	93.4522
Omega-6 fatty acid levels	ebi-a-GCST90092933	rs9295128	6	160751531	T	G	-0.19728	0.0159431	0.016832	3.59998e-35	115006	0.0013296	153.113
Omega-6 fatty acid levels	ebi-a-GCST90092933	rs11755689	6	32586376	G	A	0.0416405	0.00440473	0.334092	3.29989e-21	115006	0.000776489	89.3688
Omega-6 fatty acid levels	ebi-a-GCST90092933	rs3756772	6	116325142	T	C	0.0232823	0.00410898	0.400766	1.5e-08	115006	0.000279089	32.1053
Omega-6 fatty acid levels	ebi-a-GCST90092933	rs55747707	7	73037366	A	G	-0.0498035	0.00501986	0.203638	3.40017e-23	115006	0.000855154	98.4303
Omega-6 fatty acid levels	ebi-a-GCST90092933	rs2126259	8	9185146	C	T	0.0829891	0.00669742	0.899179	2.90001e-35	115006	0.0013333	153.539
Omega-6 fatty acid levels	ebi-a-GCST90092933	rs6471717	8	59377357	A	G	-0.0295948	0.00427438	0.663076	4.40048e-12	115006	0.000416661	47.9377
Omega-6 fatty acid levels	ebi-a-GCST90092933	rs112875651	8	126506694	A	G	-0.0635591	0.00418539	0.392337	4.40048e-52	115006	0.00200121	230.609
Omega-6 fatty acid levels	ebi-a-GCST90092933	rs2721961	8	116657911	G	T	-0.0274809	0.00449395	0.280836	9.69996e-10	115006	0.000325045	37.3937
Omega-6 fatty acid levels	ebi-a-GCST90092933	rs7831074	8	141633257	G	C	0.0276942	0.00504475	0.759123	4e-08	115006	0.000261978	30.1364
Omega-6 fatty acid levels	ebi-a-GCST90092933	rs11789603	9	107647019	T	C	0.0483698	0.00648531	0.108847	8.80035e-14	115006	0.000483456	55.6262
Omega-6 fatty acid levels	ebi-a-GCST90092933	rs2740488	9	107661742	C	A	-0.0496352	0.00457594	0.265318	2.09991e-27	115006	0.00102201	117.655
Omega-6 fatty acid levels	ebi-a-GCST90092933	rs4008004	9	15300968	A	C	0.0334374	0.00487192	0.221833	6.70039e-12	115006	0.000409417	47.1039
Omega-6 fatty acid levels	ebi-a-GCST90092933	rs115478735	9	136149711	T	A	0.0424072	0.00521297	0.183303	4.10015e-16	115006	0.000575093	66.1761
Omega-6 fatty acid levels	ebi-a-GCST90092933	rs148063610	10	45998984	CAAATAAAT	C	0.0320419	0.00484243	0.236598	3.69999e-11	115006	0.000380561	43.7827
Omega-6 fatty acid levels	ebi-a-GCST90092933	rs117488242	10	5261832	G	A	-0.0355756	0.00624596	0.131672	1.2e-08	115006	0.000282009	32.4413
Omega-6 fatty acid levels	ebi-a-GCST90092933	rs3817335	11	47643891	A	T	-0.027965	0.00421165	0.35055	3.10027e-11	115006	0.000383211	44.0877
Omega-6 fatty acid levels	ebi-a-GCST90092933	rs964184	11	116648917	C	G	-0.138873	0.00594037	0.867233	7.19449e-121	115006	0.00472965	546.514
Omega-6 fatty acid levels	ebi-a-GCST90092933	rs72997616	11	75474195	A	C	-0.0527256	0.00693794	0.094062	2.99985e-14	115006	0.00050193	57.753
Omega-6 fatty acid levels	ebi-a-GCST90092933	rs200671503	11	116817978	TTA	T	-0.0501356	0.00866302	0.058035	7.19996e-09	115006	0.000291143	33.4924
Omega-6 fatty acid levels	ebi-a-GCST90092933	rs35350651	12	111907431	AC	A	0.0277979	0.00403844	0.502598	5.79963e-12	115006	0.00041181	47.3794
Omega-6 fatty acid levels	ebi-a-GCST90092933	rs7139079	12	121415293	A	G	-0.0292329	0.00411236	0.592509	1.20005e-12	115006	0.000439188	50.5305
Omega-6 fatty acid levels	ebi-a-GCST90092933	rs6602911	13	114547372	T	C	0.0262676	0.00419748	0.360074	3.89996e-10	115006	0.000340404	39.1612
Omega-6 fatty acid levels	ebi-a-GCST90092933	rs261290	15	58678720	C	T	-0.0965237	0.00424783	0.654648	2.69774e-114	115006	0.00446959	516.329
Omega-6 fatty acid levels	ebi-a-GCST90092933	rs633695	15	58725839	G	A	0.0730669	0.00444717	0.292334	1.20005e-60	115006	0.00234172	269.939
Omega-6 fatty acid levels	ebi-a-GCST90092933	rs3764261	16	56993324	A	C	0.0616184	0.00430576	0.324448	1.9002e-46	115006	0.00177758	204.792
Omega-6 fatty acid levels	ebi-a-GCST90092933	rs76116020	16	69385641	G	A	-0.0570097	0.00986958	0.043763	7.59994e-09	115006	0.000290037	33.3651
Omega-6 fatty acid levels	ebi-a-GCST90092933	rs56325564	17	45766771	A	G	0.0227535	0.00406151	0.482656	2.1e-08	115006	0.000272824	31.3844
Omega-6 fatty acid levels	ebi-a-GCST90092933	rs740516	17	67082962	G	C	-0.0313763	0.00565493	0.151132	2.90001e-08	115006	0.000267616	30.7852
Omega-6 fatty acid levels	ebi-a-GCST90092933	rs77960347	18	47109955	G	A	0.272485	0.0176065	0.013234	5.00035e-54	115006	0.00207833	239.514
Omega-6 fatty acid levels	ebi-a-GCST90092933	rs9304381	18	47158234	T	C	0.0700213	0.0052323	0.818428	7.70016e-41	115006	0.00155482	179.088
Omega-6 fatty acid levels	ebi-a-GCST90092933	rs58542926	19	19379549	T	C	-0.1284	0.00768267	0.074379	1.10002e-62	115006	0.00242288	279.317
Omega-6 fatty acid levels	ebi-a-GCST90092933	rs56322906	19	11346155	A	G	-0.101934	0.0109515	0.035155	1.29987e-20	115006	0.000752737	86.633
Omega-6 fatty acid levels	ebi-a-GCST90092933	rs74747585	19	45039971	C	T	-0.0737645	0.0132168	0.025172	2.39999e-08	115006	0.000270772	31.1483
Omega-6 fatty acid levels	ebi-a-GCST90092933	rs1081105	19	45412955	C	A	0.118624	0.0123232	0.027622	6.20012e-22	115006	0.000805059	92.6596
Omega-6 fatty acid levels	ebi-a-GCST90092933	rs142158911	19	11190534	A	G	-0.0937617	0.00631307	0.116703	6.79986e-50	115006	0.00191433	220.578
Omega-6 fatty acid levels	ebi-a-GCST90092933	rs79429216	19	45445517	A	G	0.151678	0.0179494	0.012712	2.90001e-17	115006	0.000620519	71.4065
Omega-6 fatty acid levels	ebi-a-GCST90092933	rs1065853	19	45413233	T	G	-0.198416	0.00743205	0.080578	5.10505e-157	115006	0.00615931	712.736
Omega-6 fatty acid levels	ebi-a-GCST90092933	rs111278137	19	45215081	A	G	-0.0787637	0.0143417	0.021615	4e-08	115006	0.00026219	30.1608
Omega-6 fatty acid levels	ebi-a-GCST90092933	rs2378390	20	34150207	A	G	-0.0332858	0.0058156	0.140867	1e-08	115006	0.000284764	32.7583
Omega-6 fatty acid levels	ebi-a-GCST90092933	rs1883711	20	39179822	C	G	0.0905557	0.0118431	0.031197	2.09991e-14	115006	0.000508112	58.4646
Omega-6 fatty acid levels	ebi-a-GCST90092933	rs1800961	20	43042364	T	C	-0.0748822	0.0117724	0.030194	2e-10	115006	0.000351685	40.4594
Omega-6 fatty acid levels	ebi-a-GCST90092933	rs5754102	22	21916272	A	C	-0.0326814	0.00527073	0.183238	5.60003e-10	115006	0.000334191	38.4461
Omega-6 fatty acid levels	ebi-a-GCST90092933	rs9616847	22	50868669	T	A	0.0235066	0.00415553	0.388308	1.5e-08	115006	0.000278154	31.9977
Polyunsaturated fatty acid levels	ebi-a-GCST90092939	rs200730299	1	55491853	C	A	-0.0365447	0.00538613	0.194486	1.20005e-11	115006	0.00040013	46.0349
Polyunsaturated fatty acid levels	ebi-a-GCST90092939	rs534417	1	23784965	G	A	0.0388809	0.00603954	0.875008	1.2e-10	115006	0.000360237	41.4436
Polyunsaturated fatty acid levels	ebi-a-GCST90092939	rs1002687	1	62963737	A	G	0.0966459	0.00418603	0.644739	6.19441e-118	115006	0.00461353	533.034
Polyunsaturated fatty acid levels	ebi-a-GCST90092939	rs660240	1	109817838	C	T	0.0590181	0.00487757	0.784707	1.10002e-33	115006	0.00127142	146.405
Polyunsaturated fatty acid levels	ebi-a-GCST90092939	rs553427	1	234852760	T	C	0.0294629	0.00400838	0.517036	1.99986e-13	115006	0.000469557	54.0264
Polyunsaturated fatty acid levels	ebi-a-GCST90092939	rs672889	2	21319016	G	T	0.0741478	0.00576774	0.860074	8.00018e-38	115006	0.00143496	165.264
Polyunsaturated fatty acid levels	ebi-a-GCST90092939	rs6547409	2	21190209	T	C	-0.0840141	0.00918864	0.051259	6.09958e-20	115006	0.000726383	83.5977
Polyunsaturated fatty acid levels	ebi-a-GCST90092939	rs870526	2	20369562	T	C	-0.0326952	0.00401369	0.521425	3.80014e-16	115006	0.000576646	66.3549
Polyunsaturated fatty acid levels	ebi-a-GCST90092939	rs1260326	2	27730940	C	T	-0.0769268	0.00409565	0.604008	1e-78	115006	0.00305815	352.778
Polyunsaturated fatty acid levels	ebi-a-GCST90092939	rs4299376	2	44072576	T	G	-0.0316651	0.00429201	0.676282	1.59993e-13	115006	0.000473058	54.4293
Polyunsaturated fatty acid levels	ebi-a-GCST90092939	rs3770586	2	169828995	T	C	-0.0239799	0.0040256	0.48398	2.59998e-09	115006	0.000308446	35.4835
Polyunsaturated fatty acid levels	ebi-a-GCST90092939	rs4860948	4	69340991	A	T	0.0339763	0.00467825	0.244351	3.80014e-13	115006	0.000458422	52.7446
Polyunsaturated fatty acid levels	ebi-a-GCST90092939	rs13108218	4	3443931	G	A	-0.03457	0.00415007	0.615408	8.10028e-17	115006	0.000602984	69.3874
Polyunsaturated fatty acid levels	ebi-a-GCST90092939	rs7707394	5	74472939	A	G	0.0264956	0.0041765	0.357102	2.19999e-10	115006	0.000349824	40.2453
Polyunsaturated fatty acid levels	ebi-a-GCST90092939	rs3843482	5	74639259	G	T	0.0417429	0.00414282	0.373831	7.10068e-24	115006	0.000882002	101.523
Polyunsaturated fatty acid levels	ebi-a-GCST90092939	rs6882345	5	156397673	A	G	0.0447124	0.0041533	0.63285	5.00035e-27	115006	0.00100673	115.894
Polyunsaturated fatty acid levels	ebi-a-GCST90092939	rs9270074	6	32554129	C	T	0.0302568	0.00554793	0.844217	4.90004e-08	115006	0.000258554	29.7424
Polyunsaturated fatty acid levels	ebi-a-GCST90092939	rs6938647	6	160986915	C	A	-0.0467505	0.00491708	0.782332	1.9002e-21	115006	0.00078541	90.3963
Polyunsaturated fatty acid levels	ebi-a-GCST90092939	rs3179865	6	31324194	A	G	0.0432465	0.00442433	0.398309	1.39991e-22	115006	0.000830091	95.5431
Polyunsaturated fatty acid levels	ebi-a-GCST90092939	rs72848251	6	32601288	A	G	0.0446617	0.00519436	0.194636	8.10028e-18	115006	0.000642402	73.9263
Polyunsaturated fatty acid levels	ebi-a-GCST90092939	rs79834165	6	34889423	C	T	-0.067192	0.0110702	0.03399	1.29999e-09	115006	0.000320232	36.8397
Polyunsaturated fatty acid levels	ebi-a-GCST90092939	rs9295128	6	160751531	T	G	-0.203827	0.0158533	0.016832	7.8001e-38	115006	0.00143529	165.301
Polyunsaturated fatty acid levels	ebi-a-GCST90092939	rs3822855	6	116316882	T	G	0.024354	0.00408866	0.400782	2.59998e-09	115006	0.000308407	35.479
Polyunsaturated fatty acid levels	ebi-a-GCST90092939	rs55747707	7	73037366	A	G	-0.0613446	0.00499234	0.203638	1.10002e-34	115006	0.00131116	150.986
Polyunsaturated fatty acid levels	ebi-a-GCST90092939	rs2737245	8	116658583	T	G	-0.0289264	0.00447959	0.278612	1.09999e-10	115006	0.000362438	41.697
Polyunsaturated fatty acid levels	ebi-a-GCST90092939	rs2126259	8	9185146	C	T	0.0848201	0.00666008	0.899179	3.69999e-37	115006	0.00140834	162.193
Polyunsaturated fatty acid levels	ebi-a-GCST90092939	rs10096633	8	19830921	T	C	-0.0353479	0.00607439	0.123902	5.89997e-09	115006	0.000294356	33.8621
Polyunsaturated fatty acid levels	ebi-a-GCST90092939	rs7831074	8	141633257	G	C	0.0289646	0.00501662	0.759123	7.79992e-09	115006	0.000289779	33.3354
Polyunsaturated fatty acid levels	ebi-a-GCST90092939	rs2326077	8	59385919	T	C	-0.0289922	0.00424779	0.663245	8.80035e-12	115006	0.000404893	46.5831
Polyunsaturated fatty acid levels	ebi-a-GCST90092939	rs112875651	8	126506694	A	G	-0.0771818	0.00416206	0.392337	9.09913e-77	115006	0.00298123	343.879
Polyunsaturated fatty acid levels	ebi-a-GCST90092939	rs115478735	9	136149711	T	A	0.0377218	0.0051847	0.183303	3.40017e-13	115006	0.000460063	52.9334
Polyunsaturated fatty acid levels	ebi-a-GCST90092939	rs4008004	9	15300968	A	C	0.032262	0.00484549	0.221833	2.80027e-11	115006	0.000385318	44.3302
Polyunsaturated fatty acid levels	ebi-a-GCST90092939	rs11789603	9	107647019	T	C	0.0485333	0.00645014	0.108847	5.30029e-14	115006	0.000492048	56.6153
Polyunsaturated fatty acid levels	ebi-a-GCST90092939	rs2740488	9	107661742	C	A	-0.0487388	0.00455112	0.265318	9.20026e-27	115006	0.00099623	114.685
Polyunsaturated fatty acid levels	ebi-a-GCST90092939	rs117488242	10	5261832	G	A	-0.0395506	0.0062118	0.131672	1.89998e-10	115006	0.000352369	40.5381
Polyunsaturated fatty acid levels	ebi-a-GCST90092939	rs148063610	10	45998984	CAAATAAAT	C	0.0311139	0.00481595	0.236598	1e-10	115006	0.0003628	41.7386
Polyunsaturated fatty acid levels	ebi-a-GCST90092939	rs141469619	11	116714293	G	A	0.129333	0.0211726	0.010139	1e-09	115006	0.000324346	37.3132
Polyunsaturated fatty acid levels	ebi-a-GCST90092939	rs200671503	11	116817978	TTA	T	-0.0499493	0.00861259	0.058035	6.59994e-09	115006	0.000292377	33.6344
Polyunsaturated fatty acid levels	ebi-a-GCST90092939	rs72997616	11	75474195	A	C	-0.0661452	0.00689755	0.094062	8.80035e-22	115006	0.000798986	91.9601
Polyunsaturated fatty acid levels	ebi-a-GCST90092939	rs964184	11	116648917	C	G	-0.150407	0.00590579	0.867233	4.4978e-143	115006	0.00560812	648.593
Polyunsaturated fatty acid levels	ebi-a-GCST90092939	rs374209699	11	49104677	GT	G	0.0287195	0.00443914	0.358325	9.79941e-11	115006	0.000363812	41.8551
Polyunsaturated fatty acid levels	ebi-a-GCST90092939	rs102275	11	61557803	C	T	-0.0974467	0.00419031	0.349751	1.30017e-119	115006	0.00468041	540.797
Polyunsaturated fatty acid levels	ebi-a-GCST90092939	rs7970695	12	121423376	A	G	-0.031489	0.00413849	0.620564	2.80027e-14	115006	0.000503147	57.893
Polyunsaturated fatty acid levels	ebi-a-GCST90092939	rs4766578	12	111904371	A	T	0.0270116	0.00401614	0.503254	1.69981e-11	115006	0.00039318	45.2351
Polyunsaturated fatty acid levels	ebi-a-GCST90092939	rs6602911	13	114547372	T	C	0.0282535	0.00417476	0.360074	1.29987e-11	115006	0.000398096	45.8009
Polyunsaturated fatty acid levels	ebi-a-GCST90092939	rs12899324	15	58555709	T	C	-0.0249388	0.00453908	0.267169	3.89996e-08	115006	0.00026241	30.1862
Polyunsaturated fatty acid levels	ebi-a-GCST90092939	rs261290	15	58678720	C	T	-0.11189	0.00422379	0.654648	1.30017e-154	115006	0.00606479	701.731
Polyunsaturated fatty acid levels	ebi-a-GCST90092939	rs633695	15	58725839	G	A	0.0845004	0.004422	0.292334	2.09991e-81	115006	0.00316507	365.151
Polyunsaturated fatty acid levels	ebi-a-GCST90092939	rs3764261	16	56993324	A	C	0.0559668	0.00428245	0.324448	5.00035e-39	115006	0.0014829	170.793
Polyunsaturated fatty acid levels	ebi-a-GCST90092939	rs34955778	16	15139594	C	T	-0.0298264	0.00406597	0.419962	2.19989e-13	115006	0.000467681	53.8103
Polyunsaturated fatty acid levels	ebi-a-GCST90092939	rs76116020	16	69385641	G	A	-0.0591283	0.00981616	0.043763	1.7e-09	115006	0.000315392	36.2827
Polyunsaturated fatty acid levels	ebi-a-GCST90092939	rs56325564	17	45766771	A	G	0.0244343	0.00403952	0.482656	1.5e-09	115006	0.00031804	36.5875
Polyunsaturated fatty acid levels	ebi-a-GCST90092939	rs77960347	18	47109955	G	A	0.273167	0.0175111	0.013234	7.29962e-55	115006	0.0021115	243.345
Polyunsaturated fatty acid levels	ebi-a-GCST90092939	rs9304381	18	47158234	T	C	0.0733601	0.00520395	0.818428	4.00037e-45	115006	0.00172498	198.722
Polyunsaturated fatty acid levels	ebi-a-GCST90092939	rs58542926	19	19379549	T	C	-0.152986	0.00764087	0.074379	3.50026e-89	115006	0.00347365	400.876
Polyunsaturated fatty acid levels	ebi-a-GCST90092939	rs142158911	19	11190534	A	G	-0.0918337	0.00627871	0.116703	1.9002e-48	115006	0.00185667	213.922
Polyunsaturated fatty acid levels	ebi-a-GCST90092939	rs56322906	19	11346155	A	G	-0.104409	0.0108919	0.035155	9.20026e-22	115006	0.000798365	91.8885
Polyunsaturated fatty acid levels	ebi-a-GCST90092939	rs1065853	19	45413233	T	G	-0.169141	0.00739161	0.080578	6.9024e-116	115006	0.00453238	523.615
Polyunsaturated fatty acid levels	ebi-a-GCST90092939	rs72235114	19	45444524	CT	C	0.0453717	0.00465465	0.294918	1.9002e-22	115006	0.0008255	95.0142
Polyunsaturated fatty acid levels	ebi-a-GCST90092939	rs59774409	19	50016748	T	C	0.0449922	0.0072382	0.083061	5.1e-10	115006	0.000335851	38.6372
Polyunsaturated fatty acid levels	ebi-a-GCST90092939	rs2378390	20	34150207	A	G	-0.0322928	0.00578408	0.140867	2.39999e-08	115006	0.00027096	31.1699
Polyunsaturated fatty acid levels	ebi-a-GCST90092939	rs1883711	20	39179822	C	G	0.092425	0.0117789	0.031197	4.30031e-15	115006	0.000535077	61.569
Polyunsaturated fatty acid levels	ebi-a-GCST90092939	rs1800961	20	43042364	T	C	-0.0725012	0.0117086	0.030194	5.89997e-10	115006	0.000333285	38.3418
Polyunsaturated fatty acid levels	ebi-a-GCST90092939	rs9616847	22	50868669	T	A	0.0227377	0.00413329	0.388308	3.79997e-08	115006	0.000263067	30.2617
Polyunsaturated fatty acid levels	ebi-a-GCST90092939	rs5754102	22	21916272	A	C	-0.0299164	0.00524251	0.183238	1.2e-08	115006	0.000283072	32.5636
Ratio of docosahexaenoic acid to total fatty acid levels	ebi-a-GCST90092817	rs10127775	1	230295789	T	A	0.0310253	0.00408507	0.605608	3.10027e-14	115006	0.000501297	57.68
Ratio of docosahexaenoic acid to total fatty acid levels	ebi-a-GCST90092817	rs676210	2	21231524	A	G	0.0362521	0.00491785	0.205781	1.69981e-13	115006	0.00047227	54.3386
Ratio of docosahexaenoic acid to total fatty acid levels	ebi-a-GCST90092817	rs11681659	2	136820960	T	C	-0.0272708	0.00440326	0.716465	5.89997e-10	115006	0.000333412	38.3566
Ratio of docosahexaenoic acid to total fatty acid levels	ebi-a-GCST90092817	rs272888	5	131665423	C	T	0.0252022	0.00437739	0.706966	8.50002e-09	115006	0.000288138	33.1466
Ratio of docosahexaenoic acid to total fatty acid levels	ebi-a-GCST90092817	rs6452788	5	87712913	A	G	0.0265588	0.004674	0.239958	1.29999e-08	115006	0.000280671	32.2873
Ratio of docosahexaenoic acid to total fatty acid levels	ebi-a-GCST90092817	rs117733303	6	160922870	G	A	0.121608	0.0147968	0.018512	2.09991e-16	115006	0.000586966	67.5431
Ratio of docosahexaenoic acid to total fatty acid levels	ebi-a-GCST90092817	rs10455872	6	161010118	G	A	0.0822512	0.00739599	0.078987	9.8992e-29	115006	0.00107425	123.676
Ratio of docosahexaenoic acid to total fatty acid levels	ebi-a-GCST90092817	rs11998606	8	10663120	T	C	-0.026821	0.00416786	0.402094	1.2e-10	115006	0.000359954	41.411
Ratio of docosahexaenoic acid to total fatty acid levels	ebi-a-GCST90092817	rs328	8	19819724	G	C	0.0925597	0.00662615	0.100282	2.39994e-44	115006	0.00169381	195.125
Ratio of docosahexaenoic acid to total fatty acid levels	ebi-a-GCST90092817	rs7924036	10	65191645	T	G	0.045521	0.00398747	0.504218	3.50026e-30	115006	0.00113192	130.323
Ratio of docosahexaenoic acid to total fatty acid levels	ebi-a-GCST90092817	rs61886804	10	96749936	G	T	0.0277284	0.00498419	0.200238	2.59998e-08	115006	0.000269044	30.9494
Ratio of docosahexaenoic acid to total fatty acid levels	ebi-a-GCST90092817	rs195445	11	61744342	T	C	-0.0298494	0.00430545	0.688414	4.10015e-12	115006	0.000417765	48.0647
Ratio of docosahexaenoic acid to total fatty acid levels	ebi-a-GCST90092817	rs145786300	11	61406089	A	G	-0.14189	0.0189014	0.011993	6.09958e-14	115006	0.000489759	56.3518
Ratio of docosahexaenoic acid to total fatty acid levels	ebi-a-GCST90092817	rs12226389	11	61823630	C	T	-0.0458809	0.00515924	0.185805	6.00067e-19	115006	0.000687184	79.0833
Ratio of docosahexaenoic acid to total fatty acid levels	ebi-a-GCST90092817	rs508049	11	68675497	T	C	-0.0976913	0.00929247	0.049239	7.50067e-26	115006	0.00096009	110.52
Ratio of docosahexaenoic acid to total fatty acid levels	ebi-a-GCST90092817	rs58411334	11	75467350	T	G	-0.0377501	0.00684407	0.093795	3.50002e-08	115006	0.000264467	30.4228
Ratio of docosahexaenoic acid to total fatty acid levels	ebi-a-GCST90092817	rs964184	11	116648917	C	G	0.0691171	0.00586382	0.867233	4.60045e-32	115006	0.0012066	138.932
Ratio of docosahexaenoic acid to total fatty acid levels	ebi-a-GCST90092817	rs174564	11	61588305	G	A	-0.274933	0.00416965	0.347009	1e-200	115006	0.0364266	4347.57
Ratio of docosahexaenoic acid to total fatty acid levels	ebi-a-GCST90092817	rs9563335	13	56069705	G	A	-0.0446766	0.00775963	0.861572	8.50002e-09	115006	0.000288159	33.149
Ratio of docosahexaenoic acid to total fatty acid levels	ebi-a-GCST90092817	rs1800588	15	58723675	T	C	0.0677672	0.0048429	0.215519	1.69981e-44	115006	0.00169969	195.804
Ratio of docosahexaenoic acid to total fatty acid levels	ebi-a-GCST90092817	rs1532085	15	58683366	G	A	-0.0581405	0.00409769	0.613968	1.10002e-45	115006	0.00174743	201.313
Ratio of docosahexaenoic acid to total fatty acid levels	ebi-a-GCST90092817	rs72789541	16	15127534	A	T	-0.0796479	0.00437718	0.295973	5.50047e-74	115006	0.00287072	331.095
Ratio of docosahexaenoic acid to total fatty acid levels	ebi-a-GCST90092817	rs16940904	17	44186063	T	C	-0.038921	0.00478564	0.226566	4.19952e-16	115006	0.000574801	66.1425
Ratio of docosahexaenoic acid to total fatty acid levels	ebi-a-GCST90092817	rs72836561	17	41926126	T	C	-0.0747647	0.0114233	0.031481	6.00067e-11	115006	0.00037233	42.8354
Ratio of docosahexaenoic acid to total fatty acid levels	ebi-a-GCST90092817	rs3826688	19	45418961	C	T	-0.0234083	0.00419386	0.64095	2.39999e-08	115006	0.000270816	31.1533
Ratio of docosahexaenoic acid to total fatty acid levels	ebi-a-GCST90092817	rs2081194	19	49263477	C	G	0.0246579	0.00418282	0.601332	3.69999e-09	115006	0.00030208	34.7509
Ratio of docosahexaenoic acid to total fatty acid levels	ebi-a-GCST90092817	rs58542926	19	19379549	T	C	-0.0437276	0.0076096	0.074379	9.09997e-09	115006	0.00028704	33.0202
Ratio of docosahexaenoic acid to total fatty acid levels	ebi-a-GCST90092817	rs2294919	22	44342325	T	C	-0.0269599	0.00463855	0.247932	6.19998e-09	115006	0.000293646	33.7804
Ratio of linoleic acid to total fatty acids	ebi-a-GCST90092881	rs2843126	1	2316315	G	A	0.0235361	0.00398166	0.51824	3.40001e-09	115006	0.00030373	34.9408
Ratio of linoleic acid to total fatty acids	ebi-a-GCST90092881	rs58365744	1	171128038	C	A	-0.0266933	0.00482485	0.218557	3.2e-08	115006	0.000266073	30.6076
Ratio of linoleic acid to total fatty acids	ebi-a-GCST90092881	rs6683445	1	16368403	A	C	-0.0241725	0.00400692	0.532311	1.6e-09	115006	0.000316347	36.3927
Ratio of linoleic acid to total fatty acids	ebi-a-GCST90092881	rs4299376	2	44072576	T	G	-0.0276487	0.00426143	0.676282	8.69961e-11	115006	0.000365897	42.0951
Ratio of linoleic acid to total fatty acids	ebi-a-GCST90092881	rs13389219	2	165528876	T	C	0.028269	0.00407511	0.392574	4.00037e-12	115006	0.000418254	48.121
Ratio of linoleic acid to total fatty acids	ebi-a-GCST90092881	rs1260326	2	27730940	C	T	0.0815217	0.00406648	0.604008	2.09991e-89	115006	0.00348236	401.885
Ratio of linoleic acid to total fatty acids	ebi-a-GCST90092881	rs78058190	2	219699999	A	G	-0.0619842	0.0102992	0.050111	1.79999e-09	115006	0.000314846	36.2199
Ratio of linoleic acid to total fatty acids	ebi-a-GCST90092881	rs2972143	2	227116365	G	A	-0.0278975	0.0041516	0.645871	1.80011e-11	115006	0.000392472	45.1536
Ratio of linoleic acid to total fatty acids	ebi-a-GCST90092881	rs13179413	5	55868097	T	C	-0.0293835	0.00448985	0.2853	6.00067e-11	115006	0.000372273	42.8288
Ratio of linoleic acid to total fatty acids	ebi-a-GCST90092881	rs17244834	5	74642848	T	A	0.0329164	0.00411341	0.373899	1.20005e-15	115006	0.000556491	64.0344
Ratio of linoleic acid to total fatty acids	ebi-a-GCST90092881	rs115740542	6	26123502	C	T	-0.0445895	0.00765752	0.073589	5.80003e-09	115006	0.000294741	33.9064
Ratio of linoleic acid to total fatty acids	ebi-a-GCST90092881	rs199607859	6	139835418	T	G	0.0253238	0.00406719	0.594528	4.79999e-10	115006	0.000336978	38.7669
Ratio of linoleic acid to total fatty acids	ebi-a-GCST90092881	rs10806735	6	161105260	C	G	0.0352673	0.00436424	0.695764	6.4003e-16	115006	0.000567493	65.301
Ratio of linoleic acid to total fatty acids	ebi-a-GCST90092881	rs2180725	6	11025420	C	T	-0.0264252	0.00472321	0.231539	2.19999e-08	115006	0.000272097	31.3007
Ratio of linoleic acid to total fatty acids	ebi-a-GCST90092881	rs34062580	7	73033559	A	G	0.066051	0.00591377	0.130299	5.79963e-29	115006	0.00108352	124.745
Ratio of linoleic acid to total fatty acids	ebi-a-GCST90092881	rs56001710	7	25983400	T	A	0.0322458	0.00415707	0.58059	8.69961e-15	115006	0.000522906	60.1678
Ratio of linoleic acid to total fatty acids	ebi-a-GCST90092881	rs28601761	8	126500031	G	C	0.0663019	0.00407971	0.420103	2.19989e-59	115006	0.00229127	264.111
Ratio of linoleic acid to total fatty acids	ebi-a-GCST90092881	rs7819706	8	19844415	G	A	0.0675482	0.00615627	0.118288	5.19996e-28	115006	0.00104572	120.388
Ratio of linoleic acid to total fatty acids	ebi-a-GCST90092881	rs1441759	8	19865563	C	G	-0.107892	0.016463	0.015552	5.60015e-11	115006	0.000373317	42.949
Ratio of linoleic acid to total fatty acids	ebi-a-GCST90092881	rs2576362	9	86572575	T	G	0.0270562	0.00457308	0.254621	3.29997e-09	115006	0.000304273	35.0033
Ratio of linoleic acid to total fatty acids	ebi-a-GCST90092881	rs115478735	9	136149711	T	A	0.0321528	0.00514667	0.183303	4.20001e-10	115006	0.000339248	39.0281
Ratio of linoleic acid to total fatty acids	ebi-a-GCST90092881	rs10733306	9	16048248	T	C	0.0251941	0.00402274	0.460028	3.79997e-10	115006	0.000340946	39.2235
Ratio of linoleic acid to total fatty acids	ebi-a-GCST90092881	rs174567	11	61593005	G	A	0.186379	0.00416279	0.348291	1e-200	115006	0.0171317	2004.55
Ratio of linoleic acid to total fatty acids	ebi-a-GCST90092881	rs964184	11	116648917	C	G	0.044138	0.00585879	0.867233	4.90004e-14	115006	0.000493259	56.7547
Ratio of linoleic acid to total fatty acids	ebi-a-GCST90092881	rs11030088	11	27646247	A	G	-0.0309971	0.00459358	0.251146	1.50003e-11	115006	0.000395774	45.5336
Ratio of linoleic acid to total fatty acids	ebi-a-GCST90092881	rs141144647	11	61153501	A	G	0.0963654	0.0174444	0.014015	3.29997e-08	115006	0.000265274	30.5157
Ratio of linoleic acid to total fatty acids	ebi-a-GCST90092881	rs150684478	11	61312726	T	G	0.142546	0.0250163	0.007859	1.2e-08	115006	0.000282241	32.4681
Ratio of linoleic acid to total fatty acids	ebi-a-GCST90092881	rs7118569	11	75526482	G	C	0.0482089	0.00693918	0.090218	3.69999e-12	115006	0.000419503	48.2648
Ratio of linoleic acid to total fatty acids	ebi-a-GCST90092881	rs73412716	12	112545197	T	G	0.0545033	0.00798855	0.069268	8.9002e-12	115006	0.000404588	46.5481
Ratio of linoleic acid to total fatty acids	ebi-a-GCST90092881	rs147233090	15	44028047	T	C	-0.10949	0.0129371	0.024584	2.60016e-17	115006	0.000622421	71.6255
Ratio of linoleic acid to total fatty acids	ebi-a-GCST90092881	rs34620476	16	56996649	A	C	0.0306969	0.00402018	0.43221	2.19989e-14	115006	0.000506708	58.3029
Ratio of linoleic acid to total fatty acids	ebi-a-GCST90092881	rs4074872	16	15117299	A	G	0.0317944	0.00505147	0.234328	3.09999e-10	115006	0.000344346	39.6149
Ratio of linoleic acid to total fatty acids	ebi-a-GCST90092881	rs1809237	17	21241854	C	T	0.0254505	0.00411824	0.451133	6.4e-10	115006	0.000331974	38.1911
Ratio of linoleic acid to total fatty acids	ebi-a-GCST90092881	rs9908820	17	73408819	G	A	-0.0254012	0.0044846	0.729127	1.5e-08	115006	0.000278881	32.0814
Ratio of linoleic acid to total fatty acids	ebi-a-GCST90092881	rs116843064	19	8429323	A	G	0.114824	0.014272	0.01986	8.60003e-16	115006	0.000562511	64.7274
Ratio of linoleic acid to total fatty acids	ebi-a-GCST90092881	rs2927468	19	45357939	G	A	0.0235598	0.00403511	0.52329	5.30005e-09	115006	0.000296335	34.0898
Ratio of linoleic acid to total fatty acids	ebi-a-GCST90092881	rs1065853	19	45413233	T	G	-0.185561	0.00734163	0.080578	5.99791e-141	115006	0.00552411	638.823
Ratio of linoleic acid to total fatty acids	ebi-a-GCST90092881	rs58489806	19	19456917	T	C	0.0407904	0.0071094	0.086416	9.59997e-09	115006	0.000286158	32.9187
Ratio of linoleic acid to total fatty acids	ebi-a-GCST90092881	rs4810479	20	44545048	T	C	0.0386953	0.00459733	0.750178	3.90032e-17	115006	0.000615626	70.8431
Ratio of linoleic acid to total fatty acids	ebi-a-GCST90092881	rs2835028	21	36972695	C	A	0.0236974	0.00404689	0.411897	4.70002e-09	115006	0.000298063	34.2887
Ratio of linoleic acid to total fatty acids	ebi-a-GCST90092881	rs738408	22	44324730	T	C	0.035356	0.00483108	0.216534	2.49977e-13	115006	0.000465495	53.5587
Ratio of monounsaturated fatty acids to total fatty acids	ebi-a-GCST90092929	rs60069508	1	39964912	C	G	0.0332822	0.00468662	0.232679	1.20005e-12	115006	0.000438322	50.4309
Ratio of monounsaturated fatty acids to total fatty acids	ebi-a-GCST90092929	rs2642438	1	220970028	G	A	-0.0316508	0.00433057	0.703828	2.70023e-13	115006	0.000464256	53.416
Ratio of monounsaturated fatty acids to total fatty acids	ebi-a-GCST90092929	rs182050989	1	27262545	T	C	0.0842132	0.0119681	0.02815	1.99986e-12	115006	0.000430331	49.5111
Ratio of monounsaturated fatty acids to total fatty acids	ebi-a-GCST90092929	rs11207994	1	63047987	T	C	-0.0554569	0.00414303	0.350968	7.29962e-41	115006	0.00155553	179.171
Ratio of monounsaturated fatty acids to total fatty acids	ebi-a-GCST90092929	rs59484402	1	230302838	CT	C	-0.0497329	0.00410236	0.611698	8.00018e-34	115006	0.00127628	146.965
Ratio of monounsaturated fatty acids to total fatty acids	ebi-a-GCST90092929	rs1365297	1	93858292	G	A	-0.0284374	0.00510367	0.184215	2.5e-08	115006	0.000269884	31.0461
Ratio of monounsaturated fatty acids to total fatty acids	ebi-a-GCST90092929	rs1128249	2	165528624	T	G	-0.0365782	0.00404952	0.39204	1.69981e-19	115006	0.000708939	81.5887
Ratio of monounsaturated fatty acids to total fatty acids	ebi-a-GCST90092929	rs2972140	2	227104111	C	T	0.0371855	0.00413706	0.650628	2.49977e-19	115006	0.000702002	80.7897
Ratio of monounsaturated fatty acids to total fatty acids	ebi-a-GCST90092929	rs1260326	2	27730940	C	T	-0.0880817	0.00403978	0.604008	2.09894e-105	115006	0.00411665	475.388
Ratio of monounsaturated fatty acids to total fatty acids	ebi-a-GCST90092929	rs78058190	2	219699999	A	G	0.0729115	0.0102316	0.050111	1e-12	115006	0.00044136	50.7806
Ratio of monounsaturated fatty acids to total fatty acids	ebi-a-GCST90092929	rs676210	2	21231524	A	G	-0.0750024	0.00487347	0.205781	1.9002e-53	115006	0.00205523	236.846
Ratio of monounsaturated fatty acids to total fatty acids	ebi-a-GCST90092929	rs11235	3	52745087	C	T	0.0236933	0.00396561	0.455563	2.30001e-09	115006	0.000310296	35.6963
Ratio of monounsaturated fatty acids to total fatty acids	ebi-a-GCST90092929	rs34634128	3	136322265	GT	G	0.0302059	0.00452682	0.740357	2.49977e-11	115006	0.000386998	44.5235
Ratio of monounsaturated fatty acids to total fatty acids	ebi-a-GCST90092929	rs13108218	4	3443931	G	A	-0.0305164	0.00409307	0.615408	8.9002e-14	115006	0.000483101	55.5854
Ratio of monounsaturated fatty acids to total fatty acids	ebi-a-GCST90092929	rs1408	4	88057353	A	G	0.0277559	0.00401263	0.5793	4.60045e-12	115006	0.000415864	47.8459
Ratio of monounsaturated fatty acids to total fatty acids	ebi-a-GCST90092929	rs13107325	4	103188709	T	C	0.0432974	0.00753796	0.074274	9.29994e-09	115006	0.000286795	32.992
Ratio of monounsaturated fatty acids to total fatty acids	ebi-a-GCST90092929	rs56257534	4	171521999	T	C	-0.028794	0.00463599	0.239661	5.30005e-10	115006	0.000335315	38.5755
Ratio of monounsaturated fatty acids to total fatty acids	ebi-a-GCST90092929	rs11940694	4	39414993	G	A	0.0232844	0.0040727	0.605096	1.09999e-08	115006	0.000284133	32.6857
Ratio of monounsaturated fatty acids to total fatty acids	ebi-a-GCST90092929	rs11429307	5	55857025	GT	G	0.0453101	0.00504219	0.191495	2.60016e-19	115006	0.000701659	80.7503
Ratio of monounsaturated fatty acids to total fatty acids	ebi-a-GCST90092929	rs7704383	5	78602472	T	C	0.0232397	0.00399816	0.568885	6.19998e-09	115006	0.000293692	33.7857
Ratio of monounsaturated fatty acids to total fatty acids	ebi-a-GCST90092929	rs13186403	5	67513457	T	G	-0.027887	0.00493338	0.215276	1.6e-08	115006	0.000277762	31.9527
Ratio of monounsaturated fatty acids to total fatty acids	ebi-a-GCST90092929	rs4704834	5	156443066	G	A	0.0282772	0.004127	0.644043	7.29962e-12	115006	0.000408043	46.9458
Ratio of monounsaturated fatty acids to total fatty acids	ebi-a-GCST90092929	rs7772305	6	31328886	G	A	0.0270665	0.00450704	0.257649	1.89998e-09	115006	0.000313491	36.064
Ratio of monounsaturated fatty acids to total fatty acids	ebi-a-GCST90092929	rs632057	6	139834012	G	T	-0.0281093	0.00408932	0.627772	6.20012e-12	115006	0.000410676	47.2487
Ratio of monounsaturated fatty acids to total fatty acids	ebi-a-GCST90092929	rs998584	6	43757896	A	C	0.0274841	0.00395781	0.482288	3.80014e-12	115006	0.000419132	48.222
Ratio of monounsaturated fatty acids to total fatty acids	ebi-a-GCST90092929	rs12212146	6	161125454	C	T	0.0585156	0.00773937	0.07432	4.00037e-14	115006	0.000496816	57.1643
Ratio of monounsaturated fatty acids to total fatty acids	ebi-a-GCST90092929	rs9271573	6	32590501	C	A	0.0309673	0.0040228	0.593643	1.39991e-14	115006	0.000514998	59.2574
Ratio of monounsaturated fatty acids to total fatty acids	ebi-a-GCST90092929	rs117733303	6	160922870	G	A	-0.204486	0.0146596	0.018512	3.19963e-44	115006	0.00168899	194.57
Ratio of monounsaturated fatty acids to total fatty acids	ebi-a-GCST90092929	rs10455872	6	161010118	G	A	-0.129439	0.00732739	0.078987	7.8001e-70	115006	0.00270604	312.05
Ratio of monounsaturated fatty acids to total fatty acids	ebi-a-GCST90092929	rs3812316	7	73020337	G	C	-0.111095	0.00589053	0.129276	2.39994e-79	115006	0.00308332	355.691
Ratio of monounsaturated fatty acids to total fatty acids	ebi-a-GCST90092929	rs35163364	7	128732786	T	C	-0.0238538	0.0040061	0.432061	2.59998e-09	115006	0.000308189	35.4539
Ratio of monounsaturated fatty acids to total fatty acids	ebi-a-GCST90092929	rs56001710	7	25983400	T	A	-0.028236	0.00413256	0.58059	8.30042e-12	115006	0.000405762	46.6832
Ratio of monounsaturated fatty acids to total fatty acids	ebi-a-GCST90092929	rs72555385	7	73123473	G	A	0.0645712	0.00918104	0.049314	1.99986e-12	115006	0.000429919	49.4637
Ratio of monounsaturated fatty acids to total fatty acids	ebi-a-GCST90092929	rs1561748	8	19733244	C	G	-0.0682077	0.00481834	0.267445	1.69981e-45	115006	0.00173938	200.385
Ratio of monounsaturated fatty acids to total fatty acids	ebi-a-GCST90092929	rs328	8	19819724	G	C	-0.187461	0.00655945	0.100282	1.1995e-179	115006	0.00705169	816.732
Ratio of monounsaturated fatty acids to total fatty acids	ebi-a-GCST90092929	rs28601761	8	126500031	G	C	-0.0588524	0.00404971	0.420103	7.50067e-48	115006	0.001833	211.19
Ratio of monounsaturated fatty acids to total fatty acids	ebi-a-GCST90092929	rs3789849	8	8687054	C	G	-0.0344942	0.00401517	0.428145	8.60003e-18	115006	0.000641335	73.8035
Ratio of monounsaturated fatty acids to total fatty acids	ebi-a-GCST90092929	rs7924036	10	65191645	T	G	-0.0453884	0.00395433	0.504218	1.69981e-30	115006	0.00114426	131.746
Ratio of monounsaturated fatty acids to total fatty acids	ebi-a-GCST90092929	rs563296	10	99772404	A	G	0.0243088	0.00397826	0.557519	9.90011e-10	115006	0.000324548	37.3365
Ratio of monounsaturated fatty acids to total fatty acids	ebi-a-GCST90092929	rs603424	10	102075479	A	G	-0.0489882	0.00520289	0.17386	4.70002e-21	115006	0.000770262	88.6515
Ratio of monounsaturated fatty acids to total fatty acids	ebi-a-GCST90092929	rs2803619	10	113934384	C	G	0.0270958	0.00442396	0.724385	9.09997e-10	115006	0.000326076	37.5123
Ratio of monounsaturated fatty acids to total fatty acids	ebi-a-GCST90092929	rs174564	11	61588305	G	A	0.19826	0.00413666	0.347009	1e-200	115006	0.0195822	2297.01
Ratio of monounsaturated fatty acids to total fatty acids	ebi-a-GCST90092929	rs12294913	11	64004643	G	C	0.0643529	0.00943837	0.049051	9.20026e-12	115006	0.00040406	46.4873
Ratio of monounsaturated fatty acids to total fatty acids	ebi-a-GCST90092929	rs964184	11	116648917	C	G	-0.191265	0.00581742	0.867233	1e-200	115006	0.00931165	1080.94
Ratio of monounsaturated fatty acids to total fatty acids	ebi-a-GCST90092929	rs1047964	11	117156893	T	G	-0.229365	0.0200834	0.010066	3.29989e-30	115006	0.00113284	130.428
Ratio of monounsaturated fatty acids to total fatty acids	ebi-a-GCST90092929	rs141078087	11	27631005	AT	A	0.0259184	0.00472654	0.227757	4.20001e-08	115006	0.000261394	30.0692
Ratio of monounsaturated fatty acids to total fatty acids	ebi-a-GCST90092929	rs10750766	11	65473798	A	C	0.0286254	0.00434889	0.7098	4.60045e-11	115006	0.000376584	43.325
Ratio of monounsaturated fatty acids to total fatty acids	ebi-a-GCST90092929	rs141469619	11	116714293	G	A	0.265559	0.0208558	0.010139	3.90032e-37	115006	0.00140778	162.129
Ratio of monounsaturated fatty acids to total fatty acids	ebi-a-GCST90092929	rs3019621	11	61807783	C	T	0.0311412	0.00473182	0.773698	4.70002e-11	115006	0.00037647	43.3118
Ratio of monounsaturated fatty acids to total fatty acids	ebi-a-GCST90092929	rs11172134	12	57645789	A	T	-0.0296263	0.00493892	0.201026	2e-09	115006	0.000312777	35.9818
Ratio of monounsaturated fatty acids to total fatty acids	ebi-a-GCST90092929	rs67981690	12	21343886	G	A	0.0369237	0.00592957	0.129099	4.79999e-10	115006	0.000337052	38.7754
Ratio of monounsaturated fatty acids to total fatty acids	ebi-a-GCST90092929	rs7140110	13	114544024	C	T	0.0239699	0.0043214	0.299398	2.90001e-08	115006	0.000267453	30.7663
Ratio of monounsaturated fatty acids to total fatty acids	ebi-a-GCST90092929	rs17580	14	94847262	A	T	0.0509775	0.00926817	0.047867	3.79997e-08	115006	0.000262987	30.2525
Ratio of monounsaturated fatty acids to total fatty acids	ebi-a-GCST90092929	rs150844304	15	43726625	C	A	0.125859	0.0125196	0.025675	8.9002e-24	115006	0.000877982	101.06
Ratio of monounsaturated fatty acids to total fatty acids	ebi-a-GCST90092929	rs139110024	16	15419784	T	G	0.0688616	0.0111867	0.038881	7.49998e-10	115006	0.000329372	37.8916
Ratio of monounsaturated fatty acids to total fatty acids	ebi-a-GCST90092929	rs11644601	16	15172118	C	T	-0.0706378	0.00434554	0.296674	1.99986e-59	115006	0.00229229	264.228
Ratio of monounsaturated fatty acids to total fatty acids	ebi-a-GCST90092929	rs2925979	16	81534790	C	T	-0.0295931	0.00431041	0.698985	6.59933e-12	115006	0.000409681	47.1342
Ratio of monounsaturated fatty acids to total fatty acids	ebi-a-GCST90092929	rs821840	16	56993886	G	A	-0.0364907	0.00422885	0.324563	6.20012e-18	115006	0.000647021	74.4582
Ratio of monounsaturated fatty acids to total fatty acids	ebi-a-GCST90092929	rs9910747	17	17433959	C	A	0.045315	0.00819683	0.062203	3.2e-08	115006	0.000265678	30.5622
Ratio of monounsaturated fatty acids to total fatty acids	ebi-a-GCST90092929	rs72836561	17	41926126	T	C	0.117198	0.0113317	0.031481	4.49987e-25	115006	0.000929236	106.965
Ratio of monounsaturated fatty acids to total fatty acids	ebi-a-GCST90092929	rs1801689	17	64210580	C	A	-0.0714073	0.0115046	0.03052	5.39995e-10	115006	0.00033487	38.5243
Ratio of monounsaturated fatty acids to total fatty acids	ebi-a-GCST90092929	rs283814	19	45389224	G	A	0.0538255	0.00737802	0.922413	2.99985e-13	115006	0.000462567	53.2217
Ratio of monounsaturated fatty acids to total fatty acids	ebi-a-GCST90092929	rs9749209	19	49264547	G	A	-0.0231469	0.00422312	0.640712	4.20001e-08	115006	0.000261147	30.0408
Ratio of monounsaturated fatty acids to total fatty acids	ebi-a-GCST90092929	rs62117489	19	8442202	A	C	-0.0522453	0.00858963	0.056454	1.2e-09	115006	0.000321577	36.9946
Ratio of monounsaturated fatty acids to total fatty acids	ebi-a-GCST90092929	rs2304128	19	19746151	T	G	-0.045341	0.00737952	0.079929	8e-10	115006	0.000328143	37.7501
Ratio of monounsaturated fatty acids to total fatty acids	ebi-a-GCST90092929	rs1065853	19	45413233	T	G	0.12396	0.00729828	0.080578	1.10002e-64	115006	0.00250215	288.479
Ratio of monounsaturated fatty acids to total fatty acids	ebi-a-GCST90092929	rs116843064	19	8429323	A	G	-0.2204	0.0141877	0.01986	1.99986e-54	115006	0.00209396	241.319
Ratio of monounsaturated fatty acids to total fatty acids	ebi-a-GCST90092929	rs7679	20	44576502	C	T	0.0569608	0.00509203	0.186416	4.79954e-29	115006	0.00108687	125.13
Ratio of monounsaturated fatty acids to total fatty acids	ebi-a-GCST90092929	rs2904552	22	18905964	T	C	0.0381702	0.00665848	0.104382	9.90011e-09	115006	0.000285663	32.8618
Ratio of omega-3 fatty acids to total fatty acids	ebi-a-GCST90092932	rs6693447	1	2330190	G	T	0.0255397	0.00397732	0.461701	1.40001e-10	115006	0.000358405	41.2328
Ratio of omega-3 fatty acids to total fatty acids	ebi-a-GCST90092932	rs638714	1	62906489	T	G	-0.0322008	0.00418219	0.345965	1.39991e-14	115006	0.000515207	59.2814
Ratio of omega-3 fatty acids to total fatty acids	ebi-a-GCST90092932	rs11681659	2	136820960	T	C	-0.0275604	0.00437565	0.716465	2.99999e-10	115006	0.000344838	39.6715
Ratio of omega-3 fatty acids to total fatty acids	ebi-a-GCST90092932	rs1260326	2	27730940	C	T	-0.03861	0.004051	0.604008	1.59993e-21	115006	0.000789245	90.838
Ratio of omega-3 fatty acids to total fatty acids	ebi-a-GCST90092932	rs6717316	2	79703384	A	G	-0.0240496	0.00420843	0.670048	1.09999e-08	115006	0.000283878	32.6564
Ratio of omega-3 fatty acids to total fatty acids	ebi-a-GCST90092932	rs4860987	4	69491284	T	A	0.0394847	0.00478848	0.258612	1.59993e-16	115006	0.000590861	67.9915
Ratio of omega-3 fatty acids to total fatty acids	ebi-a-GCST90092932	rs11379773	5	87695669	GT	G	0.0274232	0.00484826	0.213412	1.5e-08	115006	0.000278114	31.9931
Ratio of omega-3 fatty acids to total fatty acids	ebi-a-GCST90092932	rs272888	5	131665423	C	T	0.028298	0.00434971	0.706966	7.70016e-11	115006	0.000367884	42.3237
Ratio of omega-3 fatty acids to total fatty acids	ebi-a-GCST90092932	rs662138	6	160564476	G	C	-0.0312278	0.0050918	0.185912	8.60003e-10	115006	0.000326947	37.6125
Ratio of omega-3 fatty acids to total fatty acids	ebi-a-GCST90092932	rs4000713	7	25990597	A	G	-0.0267482	0.00434956	0.295416	7.79992e-10	115006	0.000328727	37.8173
Ratio of omega-3 fatty acids to total fatty acids	ebi-a-GCST90092932	rs62466318	7	73042085	T	C	-0.0404238	0.00493739	0.204201	2.70023e-16	115006	0.000582513	67.0304
Ratio of omega-3 fatty acids to total fatty acids	ebi-a-GCST90092932	rs112875651	8	126506694	A	G	-0.0517835	0.00411717	0.392337	2.80027e-36	115006	0.00137362	158.189
Ratio of omega-3 fatty acids to total fatty acids	ebi-a-GCST90092932	rs7924036	10	65191645	T	G	0.0374032	0.00396292	0.504218	3.80014e-21	115006	0.000773981	89.0798
Ratio of omega-3 fatty acids to total fatty acids	ebi-a-GCST90092932	rs61886804	10	96749936	G	T	0.0351105	0.0049535	0.200238	1.39991e-12	115006	0.000436656	50.2391
Ratio of omega-3 fatty acids to total fatty acids	ebi-a-GCST90092932	rs77323894	11	60896505	C	G	0.0673413	0.0107043	0.038434	3.2e-10	115006	0.000344014	39.5766
Ratio of omega-3 fatty acids to total fatty acids	ebi-a-GCST90092932	rs964184	11	116648917	C	G	-0.0388695	0.00580799	0.867233	2.19989e-11	115006	0.000389293	44.7877
Ratio of omega-3 fatty acids to total fatty acids	ebi-a-GCST90092932	rs150370599	11	60718792	T	C	0.0472803	0.00726173	0.080318	7.50067e-11	115006	0.000368468	42.3909
Ratio of omega-3 fatty acids to total fatty acids	ebi-a-GCST90092932	rs12226389	11	61823630	C	T	-0.0642431	0.00511013	0.185805	2.99985e-36	115006	0.00137237	158.045
Ratio of omega-3 fatty acids to total fatty acids	ebi-a-GCST90092932	rs508049	11	68675497	T	C	-0.10589	0.009204	0.049239	1.20005e-30	115006	0.00114957	132.358
Ratio of omega-3 fatty acids to total fatty acids	ebi-a-GCST90092932	rs195445	11	61744342	T	C	-0.038133	0.00426447	0.688414	3.80014e-19	115006	0.000694783	79.9584
Ratio of omega-3 fatty acids to total fatty acids	ebi-a-GCST90092932	rs7944950	11	75505827	C	T	-0.0741144	0.00706143	0.085668	8.99912e-26	115006	0.000956938	110.157
Ratio of omega-3 fatty acids to total fatty acids	ebi-a-GCST90092932	rs145786300	11	61406089	A	G	-0.188873	0.0187215	0.011993	6.20012e-24	115006	0.000884207	101.777
Ratio of omega-3 fatty acids to total fatty acids	ebi-a-GCST90092932	rs174564	11	61588305	G	A	-0.391303	0.00412995	0.347009	1e-200	115006	0.0724059	8976.96
Ratio of omega-3 fatty acids to total fatty acids	ebi-a-GCST90092932	rs9563335	13	56069705	G	A	-0.0444873	0.00771128	0.861572	8e-09	115006	0.000289316	33.2822
Ratio of omega-3 fatty acids to total fatty acids	ebi-a-GCST90092932	rs1532085	15	58683366	G	A	-0.078198	0.0040709	0.613968	3.10027e-82	115006	0.00319815	368.98
Ratio of omega-3 fatty acids to total fatty acids	ebi-a-GCST90092932	rs1077835	15	58723426	G	A	0.0910667	0.00479257	0.219711	1.69981e-80	115006	0.00312968	361.056
Ratio of omega-3 fatty acids to total fatty acids	ebi-a-GCST90092932	rs139974673	15	44027885	C	T	0.083441	0.0124929	0.025916	2.39994e-11	115006	0.000387743	44.6092
Ratio of omega-3 fatty acids to total fatty acids	ebi-a-GCST90092932	rs72789541	16	15127534	A	T	-0.0992036	0.00434806	0.295973	3.1989e-115	115006	0.0045059	520.543
Ratio of omega-3 fatty acids to total fatty acids	ebi-a-GCST90092932	rs35390787	16	15678414	CA	C	0.0273295	0.00408187	0.438254	2.19989e-11	115006	0.000389633	44.8268
Ratio of omega-3 fatty acids to total fatty acids	ebi-a-GCST90092932	rs78423941	16	15421686	C	G	0.0268058	0.00486895	0.396267	3.69999e-08	115006	0.000263483	30.3095
Ratio of omega-3 fatty acids to total fatty acids	ebi-a-GCST90092932	rs8074191	17	17407191	C	T	-0.0268897	0.00462305	0.756121	5.99998e-09	115006	0.000294081	33.8304
Ratio of omega-3 fatty acids to total fatty acids	ebi-a-GCST90092932	rs16940904	17	44186063	T	C	-0.041183	0.00475547	0.226566	4.70002e-18	115006	0.000651697	74.9966
Ratio of omega-3 fatty acids to total fatty acids	ebi-a-GCST90092932	rs9947684	18	47166694	G	A	0.0282504	0.00416339	0.654466	1.20005e-11	115006	0.000400185	46.0413
Ratio of omega-3 fatty acids to total fatty acids	ebi-a-GCST90092932	rs182611493	19	19458388	G	A	-0.181074	0.0190938	0.012519	2.49977e-21	115006	0.000781389	89.9332
Ratio of omega-3 fatty acids to total fatty acids	ebi-a-GCST90092932	rs190921611	19	45441475	A	G	0.0314663	0.00462576	0.311083	1e-11	115006	0.000402189	46.2719
Ratio of omega-3 fatty acids to total fatty acids	ebi-a-GCST90092932	rs58542926	19	19379549	T	C	-0.132116	0.00756045	0.074379	2.19989e-68	115006	0.00264816	305.357
Ratio of omega-3 fatty acids to total fatty acids	ebi-a-GCST90092932	rs72654473	19	45414399	A	C	0.0390547	0.00639034	0.108331	9.90011e-10	115006	0.000324666	37.35
Ratio of omega-6 fatty acids to omega-3 fatty acids	ebi-a-GCST90092934	rs6693447	1	2330190	G	T	-0.0250996	0.00398654	0.461701	3.09999e-10	115006	0.000344565	39.64
Ratio of omega-6 fatty acids to omega-3 fatty acids	ebi-a-GCST90092934	rs583609	1	62916796	C	T	0.0428152	0.0041587	0.352508	7.39946e-25	115006	0.000920789	105.992
Ratio of omega-6 fatty acids to omega-3 fatty acids	ebi-a-GCST90092934	rs1260326	2	27730940	C	T	0.066446	0.00405986	0.604008	3.29989e-60	115006	0.00232372	267.86
Ratio of omega-6 fatty acids to omega-3 fatty acids	ebi-a-GCST90092934	rs4860987	4	69491284	T	A	-0.0411323	0.00479927	0.258612	1e-17	115006	0.00063829	73.4528
Ratio of omega-6 fatty acids to omega-3 fatty acids	ebi-a-GCST90092934	rs10075801	5	131677642	G	A	-0.02358	0.00401401	0.485487	4.20001e-09	115006	0.000299971	34.5083
Ratio of omega-6 fatty acids to omega-3 fatty acids	ebi-a-GCST90092934	rs2394976	6	31311912	T	G	0.0315075	0.00538488	0.161642	4.90004e-09	115006	0.000297595	34.2348
Ratio of omega-6 fatty acids to omega-3 fatty acids	ebi-a-GCST90092934	rs62466318	7	73042085	T	C	0.0599701	0.00494834	0.204201	8.4004e-34	115006	0.00127549	146.873
Ratio of omega-6 fatty acids to omega-3 fatty acids	ebi-a-GCST90092934	rs4000713	7	25990597	A	G	0.0302187	0.00435921	0.295416	4.10015e-12	115006	0.000417671	48.0539
Ratio of omega-6 fatty acids to omega-3 fatty acids	ebi-a-GCST90092934	rs112875651	8	126506694	A	G	0.0719492	0.00412529	0.392337	4.00037e-68	115006	0.002638	304.183
Ratio of omega-6 fatty acids to omega-3 fatty acids	ebi-a-GCST90092934	rs7819706	8	19844415	G	A	0.0363774	0.00614755	0.118288	3.29997e-09	115006	0.000304373	35.0148
Ratio of omega-6 fatty acids to omega-3 fatty acids	ebi-a-GCST90092934	rs7916868	10	64988931	T	A	-0.0282856	0.00397492	0.504504	1.10002e-12	115006	0.000440111	50.6368
Ratio of omega-6 fatty acids to omega-3 fatty acids	ebi-a-GCST90092934	rs9332238	10	96748492	A	G	-0.0347177	0.00498195	0.198299	3.19963e-12	115006	0.000422084	48.5619
Ratio of omega-6 fatty acids to omega-3 fatty acids	ebi-a-GCST90092934	rs150370599	11	60718792	T	C	-0.0475725	0.00728355	0.080318	6.4998e-11	115006	0.000370804	42.6597
Ratio of omega-6 fatty acids to omega-3 fatty acids	ebi-a-GCST90092934	rs174564	11	61588305	G	A	0.371159	0.00414236	0.347009	1e-200	115006	0.0652526	8028.17
Ratio of omega-6 fatty acids to omega-3 fatty acids	ebi-a-GCST90092934	rs77323894	11	60896505	C	G	-0.0682803	0.0107365	0.038434	2e-10	115006	0.000351554	40.4443
Ratio of omega-6 fatty acids to omega-3 fatty acids	ebi-a-GCST90092934	rs12226389	11	61823630	C	T	0.0592832	0.00512548	0.185805	6.09958e-31	115006	0.0011619	133.779
Ratio of omega-6 fatty acids to omega-3 fatty acids	ebi-a-GCST90092934	rs673335	11	75450576	C	T	0.0611093	0.00541161	0.159752	1.39991e-29	115006	0.00110754	127.513
Ratio of omega-6 fatty acids to omega-3 fatty acids	ebi-a-GCST90092934	rs11230829	11	61701898	G	A	0.103011	0.0144741	0.027785	1.10002e-12	115006	0.000440223	50.6497
Ratio of omega-6 fatty acids to omega-3 fatty acids	ebi-a-GCST90092934	rs145786300	11	61406089	A	G	0.176634	0.0187777	0.011993	5.10035e-21	115006	0.000768793	88.4823
Ratio of omega-6 fatty acids to omega-3 fatty acids	ebi-a-GCST90092934	rs195445	11	61744342	T	C	0.0344283	0.00427728	0.688414	8.30042e-16	115006	0.000563029	64.7871
Ratio of omega-6 fatty acids to omega-3 fatty acids	ebi-a-GCST90092934	rs964184	11	116648917	C	G	0.0746316	0.00582544	0.867233	1.39991e-37	115006	0.00142511	164.127
Ratio of omega-6 fatty acids to omega-3 fatty acids	ebi-a-GCST90092934	rs139974673	15	44027885	C	T	-0.117068	0.0125202	0.025916	8.69961e-21	115006	0.000759632	87.4271
Ratio of omega-6 fatty acids to omega-3 fatty acids	ebi-a-GCST90092934	rs1077835	15	58723426	G	A	-0.0998071	0.00480305	0.219711	6.59933e-96	115006	0.00374059	431.798
Ratio of omega-6 fatty acids to omega-3 fatty acids	ebi-a-GCST90092934	rs1532085	15	58683366	G	A	0.0862885	0.00407981	0.613968	2.80027e-99	115006	0.00387453	447.32
Ratio of omega-6 fatty acids to omega-3 fatty acids	ebi-a-GCST90092934	rs72789541	16	15127534	A	T	0.0906088	0.00435849	0.295973	5.40008e-96	115006	0.00374386	432.176
Ratio of omega-6 fatty acids to omega-3 fatty acids	ebi-a-GCST90092934	rs35390787	16	15678414	CA	C	-0.0255265	0.00409167	0.438254	4.39997e-10	115006	0.000338309	38.9201
Ratio of omega-6 fatty acids to omega-3 fatty acids	ebi-a-GCST90092934	rs8074191	17	17407191	C	T	0.0281472	0.00463331	0.756121	1.2e-09	115006	0.000320795	36.9046
Ratio of omega-6 fatty acids to omega-3 fatty acids	ebi-a-GCST90092934	rs2463523	17	43671737	C	A	0.0401451	0.00475753	0.23479	3.19963e-17	115006	0.000618746	71.2024
Ratio of omega-6 fatty acids to omega-3 fatty acids	ebi-a-GCST90092934	rs9947684	18	47166694	G	A	-0.0276606	0.00417279	0.654466	3.40017e-11	115006	0.00038193	43.9403
Ratio of omega-6 fatty acids to omega-3 fatty acids	ebi-a-GCST90092934	rs116843064	19	8429323	A	G	0.0882813	0.014248	0.01986	5.80003e-10	115006	0.000333706	38.3904
Ratio of omega-6 fatty acids to omega-3 fatty acids	ebi-a-GCST90092934	rs12976395	19	45441907	C	G	-0.0272184	0.0042714	0.504524	1.89998e-10	115006	0.000352948	40.6048
Ratio of omega-6 fatty acids to omega-3 fatty acids	ebi-a-GCST90092934	rs1065853	19	45413233	T	G	-0.0803838	0.00732929	0.080578	5.50047e-28	115006	0.00104481	120.283
Ratio of omega-6 fatty acids to omega-3 fatty acids	ebi-a-GCST90092934	rs58542926	19	19379549	T	C	0.144499	0.00757644	0.074379	4.30031e-81	115006	0.00315288	363.741
Ratio of omega-6 fatty acids to omega-3 fatty acids	ebi-a-GCST90092934	rs182611493	19	19458388	G	A	0.19692	0.0191342	0.012519	7.70016e-25	115006	0.000920108	105.914
Ratio of omega-6 fatty acids to omega-3 fatty acids	ebi-a-GCST90092934	rs117143374	21	40555561	C	T	0.0318136	0.00571328	0.14225	2.59998e-08	115006	0.000269536	31.0061
Ratio of omega-6 fatty acids to total fatty acids	ebi-a-GCST90092935	rs1168030	1	62968491	T	C	-0.0492915	0.00413738	0.644929	1e-32	115006	0.00123264	141.934
Ratio of omega-6 fatty acids to total fatty acids	ebi-a-GCST90092935	rs6658257	1	93820684	G	A	-0.0228432	0.00405119	0.602158	1.7e-08	115006	0.000276381	31.7937
Ratio of omega-6 fatty acids to total fatty acids	ebi-a-GCST90092935	rs59484402	1	230302838	CT	C	0.027361	0.00411002	0.611698	2.80027e-11	115006	0.000385202	44.3168
Ratio of omega-6 fatty acids to total fatty acids	ebi-a-GCST90092935	rs182050989	1	27262545	T	C	-0.0720426	0.0119904	0.02815	1.89998e-09	115006	0.000313801	36.0997
Ratio of omega-6 fatty acids to total fatty acids	ebi-a-GCST90092935	rs1260326	2	27730940	C	T	0.109743	0.00404504	0.604008	4.29536e-162	115006	0.00635941	736.038
Ratio of omega-6 fatty acids to total fatty acids	ebi-a-GCST90092935	rs4665710	2	21221035	C	A	-0.047267	0.00486875	0.792573	2.80027e-22	115006	0.000818851	94.2483
Ratio of omega-6 fatty acids to total fatty acids	ebi-a-GCST90092935	rs2972140	2	227104111	C	T	-0.0340375	0.00414245	0.650628	2.09991e-16	115006	0.000586713	67.5139
Ratio of omega-6 fatty acids to total fatty acids	ebi-a-GCST90092935	rs13389219	2	165528876	T	C	0.038325	0.00405363	0.392574	3.19963e-21	115006	0.000776637	89.3858
Ratio of omega-6 fatty acids to total fatty acids	ebi-a-GCST90092935	rs78058190	2	219699999	A	G	-0.0667368	0.010245	0.050111	7.29962e-11	115006	0.00036883	42.4326
Ratio of omega-6 fatty acids to total fatty acids	ebi-a-GCST90092935	rs684773	3	135956305	C	A	-0.0347116	0.00468622	0.767069	1.29987e-13	115006	0.000476844	54.8651
Ratio of omega-6 fatty acids to total fatty acids	ebi-a-GCST90092935	rs1471251	4	87976359	T	A	-0.0264073	0.00406317	0.397122	8.10028e-11	115006	0.000367145	42.2387
Ratio of omega-6 fatty acids to total fatty acids	ebi-a-GCST90092935	rs1316753	5	78531337	C	G	0.0228093	0.00404888	0.394862	1.79999e-08	115006	0.000275876	31.7356
Ratio of omega-6 fatty acids to total fatty acids	ebi-a-GCST90092935	rs11429307	5	55857025	GT	G	-0.0445358	0.00504741	0.191495	1.10002e-18	115006	0.000676499	77.8527
Ratio of omega-6 fatty acids to total fatty acids	ebi-a-GCST90092935	rs117733303	6	160922870	G	A	0.209889	0.014679	0.018512	2.19989e-46	115006	0.00177458	204.446
Ratio of omega-6 fatty acids to total fatty acids	ebi-a-GCST90092935	rs12212146	6	161125454	C	T	-0.0567627	0.00774962	0.07432	2.39994e-13	115006	0.000466275	53.6485
Ratio of omega-6 fatty acids to total fatty acids	ebi-a-GCST90092935	rs28752523	6	32584772	T	C	-0.0353026	0.00500867	0.193826	1.80011e-12	115006	0.000431778	49.6776
Ratio of omega-6 fatty acids to total fatty acids	ebi-a-GCST90092935	rs6938550	6	20462138	A	G	0.0399771	0.00706603	0.914146	1.5e-08	115006	0.000278247	32.0084
Ratio of omega-6 fatty acids to total fatty acids	ebi-a-GCST90092935	rs10455872	6	161010118	G	A	0.138305	0.0073371	0.078987	2.90001e-79	115006	0.00308011	355.32
Ratio of omega-6 fatty acids to total fatty acids	ebi-a-GCST90092935	rs6905288	6	43758873	A	G	-0.02552	0.00398662	0.568514	1.5e-10	115006	0.000356186	40.9774
Ratio of omega-6 fatty acids to total fatty acids	ebi-a-GCST90092935	rs199607859	6	139835418	T	G	0.0317367	0.00404516	0.594528	4.30031e-15	115006	0.000534933	61.5523
Ratio of omega-6 fatty acids to total fatty acids	ebi-a-GCST90092935	rs56001710	7	25983400	T	A	0.0335314	0.00413696	0.58059	5.30029e-16	115006	0.000570916	65.6951
Ratio of omega-6 fatty acids to total fatty acids	ebi-a-GCST90092935	rs3812316	7	73020337	G	C	0.0993677	0.0058968	0.129276	1e-63	115006	0.00246301	283.955
Ratio of omega-6 fatty acids to total fatty acids	ebi-a-GCST90092935	rs72555385	7	73123473	G	A	-0.0540068	0.0091908	0.049314	4.20001e-09	115006	0.000300151	34.5289
Ratio of omega-6 fatty acids to total fatty acids	ebi-a-GCST90092935	rs11976955	7	130433594	G	C	-0.0256733	0.00427463	0.314171	1.89998e-09	115006	0.000313552	36.071
Ratio of omega-6 fatty acids to total fatty acids	ebi-a-GCST90092935	rs1561748	8	19733244	C	G	0.0494364	0.00482644	0.267445	1.29987e-24	115006	0.00091143	104.914
Ratio of omega-6 fatty acids to total fatty acids	ebi-a-GCST90092935	rs328	8	19819724	G	C	0.137521	0.00657047	0.100282	2.80027e-97	115006	0.00379467	438.064
Ratio of omega-6 fatty acids to total fatty acids	ebi-a-GCST90092935	rs4646246	8	18248661	G	A	-0.028569	0.00511872	0.182591	2.39999e-08	115006	0.000270788	31.1501
Ratio of omega-6 fatty acids to total fatty acids	ebi-a-GCST90092935	rs28601761	8	126500031	G	C	0.0853476	0.00405652	0.420103	2.80027e-98	115006	0.0038343	442.658
Ratio of omega-6 fatty acids to total fatty acids	ebi-a-GCST90092935	rs3860846	8	126631687	T	C	-0.030052	0.00447696	0.275985	1.9002e-11	115006	0.000391642	45.0581
Ratio of omega-6 fatty acids to total fatty acids	ebi-a-GCST90092935	rs1736070	8	11665805	T	C	0.0259828	0.00425289	0.666408	1e-09	115006	0.000324446	37.3247
Ratio of omega-6 fatty acids to total fatty acids	ebi-a-GCST90092935	rs295268	9	86429305	C	T	0.0280531	0.00454438	0.256162	6.69993e-10	115006	0.000331244	38.107
Ratio of omega-6 fatty acids to total fatty acids	ebi-a-GCST90092935	rs10733306	9	16048248	T	C	0.0220496	0.00400412	0.460028	3.69999e-08	115006	0.000263604	30.3235
Ratio of omega-6 fatty acids to total fatty acids	ebi-a-GCST90092935	rs2068888	10	94839642	A	G	0.0257216	0.0039792	0.450146	1e-10	115006	0.000363184	41.7827
Ratio of omega-6 fatty acids to total fatty acids	ebi-a-GCST90092935	rs12419462	11	27623309	A	G	-0.0285755	0.00471709	0.228758	1.40001e-09	115006	0.000318992	36.6971
Ratio of omega-6 fatty acids to total fatty acids	ebi-a-GCST90092935	rs174528	11	61543499	C	T	0.0251335	0.00408383	0.377233	7.49998e-10	115006	0.000329236	37.8759
Ratio of omega-6 fatty acids to total fatty acids	ebi-a-GCST90092935	rs144018203	11	116916060	C	G	-0.191837	0.0200496	0.010652	1.10002e-21	115006	0.000795403	91.5473
Ratio of omega-6 fatty acids to total fatty acids	ebi-a-GCST90092935	rs35169799	11	64031241	T	C	-0.0485534	0.00814674	0.063323	2.5e-09	115006	0.000308757	35.5193
Ratio of omega-6 fatty acids to total fatty acids	ebi-a-GCST90092935	rs964184	11	116648917	C	G	0.136188	0.00583695	0.867233	2.09894e-120	115006	0.00471123	544.375
Ratio of omega-6 fatty acids to total fatty acids	ebi-a-GCST90092935	rs1047964	11	117156893	T	G	0.17031	0.0201508	0.010066	2.90001e-17	115006	0.000620734	71.4312
Ratio of omega-6 fatty acids to total fatty acids	ebi-a-GCST90092935	rs1546224	12	63696548	T	C	-0.0236674	0.00429622	0.308641	3.59998e-08	115006	0.000263811	30.3473
Ratio of omega-6 fatty acids to total fatty acids	ebi-a-GCST90092935	rs73412716	12	112545197	T	G	0.0526186	0.0079499	0.069268	3.59998e-11	115006	0.000380776	43.8074
Ratio of omega-6 fatty acids to total fatty acids	ebi-a-GCST90092935	rs10773049	12	124506631	C	T	0.022457	0.00405767	0.393124	3.09999e-08	115006	0.000266265	30.6297
Ratio of omega-6 fatty acids to total fatty acids	ebi-a-GCST90092935	rs473224	15	58737341	G	T	0.0600834	0.00567866	0.853934	3.69999e-26	115006	0.000972466	111.946
Ratio of omega-6 fatty acids to total fatty acids	ebi-a-GCST90092935	rs139974673	15	44027885	C	T	-0.138506	0.0124863	0.025916	1.39991e-28	115006	0.00106877	123.044
Ratio of omega-6 fatty acids to total fatty acids	ebi-a-GCST90092935	rs7402939	15	99183876	C	T	-0.023501	0.00413068	0.623528	1.29999e-08	115006	0.000281376	32.3685
Ratio of omega-6 fatty acids to total fatty acids	ebi-a-GCST90092935	rs261290	15	58678720	C	T	0.0617512	0.00417436	0.654648	1.59993e-49	115006	0.00189917	218.828
Ratio of omega-6 fatty acids to total fatty acids	ebi-a-GCST90092935	rs11508026	16	56999328	T	C	0.027324	0.00401029	0.432471	9.49948e-12	115006	0.000403498	46.4226
Ratio of omega-6 fatty acids to total fatty acids	ebi-a-GCST90092935	rs111351217	17	41163974	A	G	-0.0497368	0.00903706	0.052245	3.69999e-08	115006	0.000263309	30.2896
Ratio of omega-6 fatty acids to total fatty acids	ebi-a-GCST90092935	rs72836561	17	41926126	T	C	-0.0837853	0.011342	0.031481	1.50003e-13	115006	0.000474275	54.5694
Ratio of omega-6 fatty acids to total fatty acids	ebi-a-GCST90092935	rs1801689	17	64210580	C	A	0.0641739	0.0115152	0.03052	2.5e-08	115006	0.000269983	31.0575
Ratio of omega-6 fatty acids to total fatty acids	ebi-a-GCST90092935	rs9908820	17	73408819	G	A	-0.0279066	0.00446315	0.729127	4e-10	115006	0.000339831	39.0952
Ratio of omega-6 fatty acids to total fatty acids	ebi-a-GCST90092935	rs58489806	19	19456917	T	C	0.070387	0.00707508	0.086416	2.60016e-23	115006	0.000859861	98.9725
Ratio of omega-6 fatty acids to total fatty acids	ebi-a-GCST90092935	rs56290633	19	45401783	C	T	-0.0299572	0.00428295	0.53952	2.70023e-12	115006	0.000425218	48.9225
Ratio of omega-6 fatty acids to total fatty acids	ebi-a-GCST90092935	rs499765	19	49266390	G	C	0.0255461	0.00422799	0.338912	1.5e-09	115006	0.000317339	36.5068
Ratio of omega-6 fatty acids to total fatty acids	ebi-a-GCST90092935	rs116843064	19	8429323	A	G	0.183791	0.0142031	0.01986	2.70023e-38	115006	0.00145388	167.446
Ratio of omega-6 fatty acids to total fatty acids	ebi-a-GCST90092935	rs1065853	19	45413233	T	G	-0.149197	0.00730619	0.080578	1.10002e-92	115006	0.00361282	416.995
Ratio of omega-6 fatty acids to total fatty acids	ebi-a-GCST90092935	rs6073958	20	44551855	C	T	-0.0474619	0.00497167	0.198745	1.29987e-21	115006	0.00079181	91.1335
Ratio of polyunsaturated fatty acids to monounsaturated fatty acids	ebi-a-GCST90092940	rs11207994	1	63047987	T	C	0.0483135	0.00414235	0.350968	1.99986e-31	115006	0.00118143	136.03
Ratio of polyunsaturated fatty acids to monounsaturated fatty acids	ebi-a-GCST90092940	rs79598313	1	27284913	T	C	-0.0907507	0.0131236	0.023212	4.70002e-12	115006	0.000415617	47.8175
Ratio of polyunsaturated fatty acids to monounsaturated fatty acids	ebi-a-GCST90092940	rs59484402	1	230302838	CT	C	0.0439539	0.00410168	0.611698	8.60003e-27	115006	0.00099751	114.832
Ratio of polyunsaturated fatty acids to monounsaturated fatty acids	ebi-a-GCST90092940	rs61781371	1	40052108	G	C	-0.0318307	0.00474092	0.224153	1.9002e-11	115006	0.000391811	45.0775
Ratio of polyunsaturated fatty acids to monounsaturated fatty acids	ebi-a-GCST90092940	rs78058190	2	219699999	A	G	-0.0701519	0.0102274	0.050111	6.89922e-12	115006	0.000408931	47.048
Ratio of polyunsaturated fatty acids to monounsaturated fatty acids	ebi-a-GCST90092940	rs1260326	2	27730940	C	T	0.0928958	0.00403812	0.604008	4.19759e-117	115006	0.00458057	529.208
Ratio of polyunsaturated fatty acids to monounsaturated fatty acids	ebi-a-GCST90092940	rs673548	2	21237544	A	G	0.0632408	0.00486886	0.206089	1.39991e-38	115006	0.00146482	168.707
Ratio of polyunsaturated fatty acids to monounsaturated fatty acids	ebi-a-GCST90092940	rs182549	2	136616754	T	C	-0.0245223	0.00446797	0.738671	4.09996e-08	115006	0.000261859	30.1227
Ratio of polyunsaturated fatty acids to monounsaturated fatty acids	ebi-a-GCST90092940	rs13389219	2	165528876	T	C	0.0378446	0.00404669	0.392574	8.60003e-21	115006	0.000759902	87.4582
Ratio of polyunsaturated fatty acids to monounsaturated fatty acids	ebi-a-GCST90092940	rs2972140	2	227104111	C	T	-0.0372675	0.00413536	0.650628	1.99986e-19	115006	0.000705678	81.2131
Ratio of polyunsaturated fatty acids to monounsaturated fatty acids	ebi-a-GCST90092940	rs655720	3	136103267	T	C	-0.0299513	0.00440712	0.718817	1.10002e-11	115006	0.000401446	46.1864
Ratio of polyunsaturated fatty acids to monounsaturated fatty acids	ebi-a-GCST90092940	rs11235	3	52745087	C	T	-0.0221257	0.00396421	0.455563	2.39999e-08	115006	0.000270796	31.1511
Ratio of polyunsaturated fatty acids to monounsaturated fatty acids	ebi-a-GCST90092940	rs10937924	4	3374898	C	T	-0.0246006	0.00402414	0.591416	9.80009e-10	115006	0.000324851	37.3713
Ratio of polyunsaturated fatty acids to monounsaturated fatty acids	ebi-a-GCST90092940	rs1471251	4	87976359	T	A	-0.0276545	0.00405636	0.397122	9.30037e-12	115006	0.000403983	46.4784
Ratio of polyunsaturated fatty acids to monounsaturated fatty acids	ebi-a-GCST90092940	rs2049245	4	171566778	T	G	0.0252177	0.00437515	0.294001	8.19993e-09	115006	0.000288788	33.2214
Ratio of polyunsaturated fatty acids to monounsaturated fatty acids	ebi-a-GCST90092940	rs2035816	4	100508556	G	A	0.0393916	0.00712954	0.084302	3.29997e-08	115006	0.000265368	30.5265
Ratio of polyunsaturated fatty acids to monounsaturated fatty acids	ebi-a-GCST90092940	rs11429307	5	55857025	GT	G	-0.0451157	0.00503968	0.191495	3.50026e-19	115006	0.000696348	80.1386
Ratio of polyunsaturated fatty acids to monounsaturated fatty acids	ebi-a-GCST90092940	rs6866758	5	156455112	T	C	0.0301443	0.00511112	0.186697	3.69999e-09	115006	0.000302361	34.7833
Ratio of polyunsaturated fatty acids to monounsaturated fatty acids	ebi-a-GCST90092940	rs71615507	5	78432799	GTATATA	G	-0.022762	0.00407944	0.614475	2.39999e-08	115006	0.000270634	31.1324
Ratio of polyunsaturated fatty acids to monounsaturated fatty acids	ebi-a-GCST90092940	rs117733303	6	160922870	G	A	0.209953	0.0146543	0.018512	1.50003e-46	115006	0.00178164	205.261
Ratio of polyunsaturated fatty acids to monounsaturated fatty acids	ebi-a-GCST90092940	rs12212146	6	161125454	C	T	-0.0594838	0.00773658	0.07432	1.50003e-14	115006	0.000513755	59.1142
Ratio of polyunsaturated fatty acids to monounsaturated fatty acids	ebi-a-GCST90092940	rs998584	6	43757896	A	C	-0.0258306	0.00395639	0.482288	6.59933e-11	115006	0.000370501	42.6249
Ratio of polyunsaturated fatty acids to monounsaturated fatty acids	ebi-a-GCST90092940	rs10455872	6	161010118	G	A	0.134049	0.00732476	0.078987	8.10028e-75	115006	0.00290373	334.914
Ratio of polyunsaturated fatty acids to monounsaturated fatty acids	ebi-a-GCST90092940	rs9271573	6	32590501	C	A	-0.0285962	0.00402135	0.593643	1.20005e-12	115006	0.000439503	50.5668
Ratio of polyunsaturated fatty acids to monounsaturated fatty acids	ebi-a-GCST90092940	rs632057	6	139834012	G	T	0.0289383	0.00408785	0.627772	1.50003e-12	115006	0.000435558	50.1128
Ratio of polyunsaturated fatty acids to monounsaturated fatty acids	ebi-a-GCST90092940	rs35163364	7	128732786	T	C	0.0231875	0.00400474	0.432061	7.00003e-09	115006	0.000291415	33.5237
Ratio of polyunsaturated fatty acids to monounsaturated fatty acids	ebi-a-GCST90092940	rs56001710	7	25983400	T	A	0.0295864	0.00413116	0.58059	8.00018e-13	115006	0.000445786	51.29
Ratio of polyunsaturated fatty acids to monounsaturated fatty acids	ebi-a-GCST90092940	rs72555385	7	73123473	G	A	-0.057192	0.00917792	0.049314	4.60002e-10	115006	0.000337532	38.8306
Ratio of polyunsaturated fatty acids to monounsaturated fatty acids	ebi-a-GCST90092940	rs3812316	7	73020337	G	C	0.100715	0.00588853	0.129276	1.39991e-65	115006	0.00253718	292.528
Ratio of polyunsaturated fatty acids to monounsaturated fatty acids	ebi-a-GCST90092940	rs328	8	19819724	G	C	0.171634	0.00655851	0.100282	5.90201e-151	115006	0.00591967	684.839
Ratio of polyunsaturated fatty acids to monounsaturated fatty acids	ebi-a-GCST90092940	rs752446	8	10649767	A	G	-0.0318251	0.00408156	0.375217	6.29941e-15	115006	0.000528369	60.7966
Ratio of polyunsaturated fatty acids to monounsaturated fatty acids	ebi-a-GCST90092940	rs28601761	8	126500031	G	C	0.062988	0.00404914	0.420103	1.50003e-54	115006	0.0020997	241.982
Ratio of polyunsaturated fatty acids to monounsaturated fatty acids	ebi-a-GCST90092940	rs1561748	8	19733244	C	G	0.0615726	0.00481766	0.267445	2.09991e-37	115006	0.00141829	163.341
Ratio of polyunsaturated fatty acids to monounsaturated fatty acids	ebi-a-GCST90092940	rs9419746	10	94508055	T	C	-0.0285046	0.00489086	0.212625	5.60003e-09	115006	0.000295264	33.9666
Ratio of polyunsaturated fatty acids to monounsaturated fatty acids	ebi-a-GCST90092940	rs603424	10	102075479	A	G	0.0329406	0.00520152	0.17386	2.39999e-10	115006	0.000348603	40.1047
Ratio of polyunsaturated fatty acids to monounsaturated fatty acids	ebi-a-GCST90092940	rs7924036	10	65191645	T	G	0.0433983	0.00395329	0.504218	4.90004e-28	115006	0.00104677	120.509
Ratio of polyunsaturated fatty acids to monounsaturated fatty acids	ebi-a-GCST90092940	rs4963506	11	62187666	A	G	-0.0305383	0.00498498	0.19572	8.99995e-10	115006	0.000326213	37.528
Ratio of polyunsaturated fatty acids to monounsaturated fatty acids	ebi-a-GCST90092940	rs2302263	11	64021821	T	C	-0.0444171	0.0069839	0.088121	2e-10	115006	0.000351586	40.448
Ratio of polyunsaturated fatty acids to monounsaturated fatty acids	ebi-a-GCST90092940	rs1047964	11	117156893	T	G	0.208578	0.0200899	0.010066	2.99985e-25	115006	0.000936384	107.789
Ratio of polyunsaturated fatty acids to monounsaturated fatty acids	ebi-a-GCST90092940	rs149402055	11	68525539	T	C	-0.0981143	0.0148999	0.019716	4.60045e-11	115006	0.000376889	43.3601
Ratio of polyunsaturated fatty acids to monounsaturated fatty acids	ebi-a-GCST90092940	rs964184	11	116648917	C	G	0.163581	0.00581931	0.867233	7.39605e-174	115006	0.00682384	790.16
Ratio of polyunsaturated fatty acids to monounsaturated fatty acids	ebi-a-GCST90092940	rs141469619	11	116714293	G	A	-0.235376	0.0208626	0.010139	1.59993e-29	115006	0.00110557	127.286
Ratio of polyunsaturated fatty acids to monounsaturated fatty acids	ebi-a-GCST90092940	rs141078087	11	27631005	AT	A	-0.0288311	0.00472808	0.227757	1.09999e-09	115006	0.000323215	37.1831
Ratio of polyunsaturated fatty acids to monounsaturated fatty acids	ebi-a-GCST90092940	rs174564	11	61588305	G	A	-0.171218	0.004138	0.347009	1e-200	115006	0.0146683	1712.03
Ratio of polyunsaturated fatty acids to monounsaturated fatty acids	ebi-a-GCST90092940	rs67981690	12	21343886	G	A	-0.032937	0.00592702	0.129099	2.69998e-08	115006	0.000268447	30.8807
Ratio of polyunsaturated fatty acids to monounsaturated fatty acids	ebi-a-GCST90092940	rs150844304	15	43726625	C	A	-0.120063	0.0125136	0.025675	8.4004e-22	115006	0.000799808	92.0548
Ratio of polyunsaturated fatty acids to monounsaturated fatty acids	ebi-a-GCST90092940	rs7402939	15	99183876	C	T	-0.0228208	0.00412623	0.623528	3.2e-08	115006	0.0002659	30.5877
Ratio of polyunsaturated fatty acids to monounsaturated fatty acids	ebi-a-GCST90092940	rs2925979	16	81534790	C	T	0.0276226	0.00430905	0.698985	1.5e-10	115006	0.000357183	41.0921
Ratio of polyunsaturated fatty acids to monounsaturated fatty acids	ebi-a-GCST90092940	rs11644601	16	15172118	C	T	0.0656563	0.00434417	0.296674	1.29987e-51	115006	0.00198224	228.419
Ratio of polyunsaturated fatty acids to monounsaturated fatty acids	ebi-a-GCST90092940	rs139110024	16	15419784	T	G	-0.0612664	0.0111832	0.038881	4.30002e-08	115006	0.000260903	30.0127
Ratio of polyunsaturated fatty acids to monounsaturated fatty acids	ebi-a-GCST90092940	rs56156922	16	56987369	C	T	0.034575	0.00423943	0.32432	3.50026e-16	115006	0.000578013	66.5123
Ratio of polyunsaturated fatty acids to monounsaturated fatty acids	ebi-a-GCST90092940	rs9908820	17	73408819	G	A	-0.0260574	0.0044571	0.729127	5e-09	115006	0.000297104	34.1783
Ratio of polyunsaturated fatty acids to monounsaturated fatty acids	ebi-a-GCST90092940	rs72836561	17	41926126	T	C	-0.10669	0.0113266	0.031481	4.49987e-21	115006	0.000770891	88.7239
Ratio of polyunsaturated fatty acids to monounsaturated fatty acids	ebi-a-GCST90092940	rs1801689	17	64210580	C	A	0.069546	0.0114995	0.03052	1.5e-09	115006	0.000317927	36.5745
Ratio of polyunsaturated fatty acids to monounsaturated fatty acids	ebi-a-GCST90092940	rs116843064	19	8429323	A	G	0.202603	0.0141832	0.01986	2.70023e-46	115006	0.00177114	204.05
Ratio of polyunsaturated fatty acids to monounsaturated fatty acids	ebi-a-GCST90092940	rs283814	19	45389224	G	A	-0.0501976	0.00737568	0.922413	1e-11	115006	0.000402593	46.3185
Ratio of polyunsaturated fatty acids to monounsaturated fatty acids	ebi-a-GCST90092940	rs1065853	19	45413233	T	G	-0.125864	0.00729596	0.080578	1.10002e-66	115006	0.00258104	297.598
Ratio of polyunsaturated fatty acids to monounsaturated fatty acids	ebi-a-GCST90092940	rs79293855	19	8420583	A	G	0.0621565	0.0113383	0.031468	4.20001e-08	115006	0.000261242	30.0517
Ratio of polyunsaturated fatty acids to monounsaturated fatty acids	ebi-a-GCST90092940	rs2081194	19	49263477	C	G	0.0261162	0.00414566	0.601332	2.99999e-10	115006	0.000344955	39.6849
Ratio of polyunsaturated fatty acids to monounsaturated fatty acids	ebi-a-GCST90092940	rs6073958	20	44551855	C	T	-0.0569452	0.00496527	0.198745	1.9002e-30	115006	0.00114238	131.529
Ratio of polyunsaturated fatty acids to total fatty acids	ebi-a-GCST90092941	rs79598313	1	27284913	T	C	-0.0818364	0.0131684	0.023212	5.1e-10	115006	0.000335707	38.6206
Ratio of polyunsaturated fatty acids to total fatty acids	ebi-a-GCST90092941	rs1180384	1	39892774	C	T	-0.0256419	0.00431269	0.302451	2.80001e-09	115006	0.000307291	35.3506
Ratio of polyunsaturated fatty acids to total fatty acids	ebi-a-GCST90092941	rs1168041	1	62960250	C	T	-0.036211	0.00424	0.65536	1.29987e-17	115006	0.000633802	72.936
Ratio of polyunsaturated fatty acids to total fatty acids	ebi-a-GCST90092941	rs59484402	1	230302838	CT	C	0.032958	0.00411569	0.611698	1.20005e-15	115006	0.00055728	64.1252
Ratio of polyunsaturated fatty acids to total fatty acids	ebi-a-GCST90092941	rs182549	2	136616754	T	C	-0.0271731	0.00448263	0.738671	1.29999e-09	115006	0.000319414	36.7456
Ratio of polyunsaturated fatty acids to total fatty acids	ebi-a-GCST90092941	rs2972140	2	227104111	C	T	-0.0339204	0.00414893	0.650628	2.90001e-16	115006	0.000580867	66.8409
Ratio of polyunsaturated fatty acids to total fatty acids	ebi-a-GCST90092941	rs13389219	2	165528876	T	C	0.0354489	0.00405997	0.392574	2.49977e-18	115006	0.000662448	76.2346
Ratio of polyunsaturated fatty acids to total fatty acids	ebi-a-GCST90092941	rs673548	2	21237544	A	G	0.0428037	0.00488484	0.206089	1.9002e-18	115006	0.000667193	76.7811
Ratio of polyunsaturated fatty acids to total fatty acids	ebi-a-GCST90092941	rs1260326	2	27730940	C	T	0.0904386	0.00405137	0.604008	2.19786e-110	115006	0.00431425	498.306
Ratio of polyunsaturated fatty acids to total fatty acids	ebi-a-GCST90092941	rs78058190	2	219699999	A	G	-0.0623769	0.010261	0.050111	1.2e-09	115006	0.000321224	36.9539
Ratio of polyunsaturated fatty acids to total fatty acids	ebi-a-GCST90092941	rs655720	3	136103267	T	C	-0.0282098	0.00442029	0.718817	1.7e-10	115006	0.000354017	40.7278
Ratio of polyunsaturated fatty acids to total fatty acids	ebi-a-GCST90092941	rs10020067	4	88181491	A	C	-0.0271278	0.00408019	0.381441	2.99985e-11	115006	0.000384221	44.2039
Ratio of polyunsaturated fatty acids to total fatty acids	ebi-a-GCST90092941	rs2035816	4	100508556	G	A	0.0395074	0.00715195	0.084302	3.29997e-08	115006	0.00026526	30.5141
Ratio of polyunsaturated fatty acids to total fatty acids	ebi-a-GCST90092941	rs11429307	5	55857025	GT	G	-0.0398522	0.00505445	0.191495	3.19963e-15	115006	0.000540258	62.1655
Ratio of polyunsaturated fatty acids to total fatty acids	ebi-a-GCST90092941	rs12212146	6	161125454	C	T	-0.0576534	0.00776188	0.07432	1.10002e-13	115006	0.000479498	55.1707
Ratio of polyunsaturated fatty acids to total fatty acids	ebi-a-GCST90092941	rs150543195	6	32526028	A	G	-0.0389899	0.00651924	0.16468	2.19999e-09	115006	0.000310924	35.7687
Ratio of polyunsaturated fatty acids to total fatty acids	ebi-a-GCST90092941	rs6905288	6	43758873	A	G	-0.0225343	0.00399293	0.568514	1.7e-08	115006	0.000276862	31.8491
Ratio of polyunsaturated fatty acids to total fatty acids	ebi-a-GCST90092941	rs117733303	6	160922870	G	A	0.201764	0.0147022	0.018512	7.39946e-43	115006	0.0016349	188.328
Ratio of polyunsaturated fatty acids to total fatty acids	ebi-a-GCST90092941	rs632057	6	139834012	G	T	0.0277938	0.00410121	0.627772	1.20005e-11	115006	0.000399188	45.9266
Ratio of polyunsaturated fatty acids to total fatty acids	ebi-a-GCST90092941	rs10455872	6	161010118	G	A	0.131843	0.00734871	0.078987	5.60015e-72	115006	0.00279099	321.873
Ratio of polyunsaturated fatty acids to total fatty acids	ebi-a-GCST90092941	rs3812316	7	73020337	G	C	0.0778554	0.00590595	0.129276	1.10002e-39	115006	0.00150877	173.776
Ratio of polyunsaturated fatty acids to total fatty acids	ebi-a-GCST90092941	rs56001710	7	25983400	T	A	0.0293876	0.00414338	0.58059	1.29987e-12	115006	0.000437228	50.305
Ratio of polyunsaturated fatty acids to total fatty acids	ebi-a-GCST90092941	rs1561748	8	19733244	C	G	0.0475746	0.00483476	0.267445	7.59976e-23	115006	0.000841229	96.8262
Ratio of polyunsaturated fatty acids to total fatty acids	ebi-a-GCST90092941	rs4871624	8	126629328	G	T	-0.0244535	0.00440683	0.28745	2.90001e-08	115006	0.000267666	30.7909
Ratio of polyunsaturated fatty acids to total fatty acids	ebi-a-GCST90092941	rs752446	8	10649767	A	G	-0.0259432	0.00409605	0.375217	2.39999e-10	115006	0.000348694	40.1152
Ratio of polyunsaturated fatty acids to total fatty acids	ebi-a-GCST90092941	rs328	8	19819724	G	C	0.136102	0.0065818	0.100282	5.40008e-95	115006	0.00370431	427.594
Ratio of polyunsaturated fatty acids to total fatty acids	ebi-a-GCST90092941	rs28601761	8	126500031	G	C	0.0623923	0.00406351	0.420103	3.29989e-53	115006	0.00204574	235.75
Ratio of polyunsaturated fatty acids to total fatty acids	ebi-a-GCST90092941	rs10746732	9	86694759	A	G	-0.0281475	0.00483206	0.777542	5.69994e-09	115006	0.000294962	33.9318
Ratio of polyunsaturated fatty acids to total fatty acids	ebi-a-GCST90092941	rs7924036	10	65191645	T	G	0.0366406	0.00396562	0.504218	2.49977e-20	115006	0.000741755	85.3681
Ratio of polyunsaturated fatty acids to total fatty acids	ebi-a-GCST90092941	rs9419746	10	94508055	T	C	-0.0294304	0.00490611	0.212625	2e-09	115006	0.000312796	35.9841
Ratio of polyunsaturated fatty acids to total fatty acids	ebi-a-GCST90092941	rs964184	11	116648917	C	G	0.114932	0.00584203	0.867233	3.69999e-86	115006	0.00335409	387.032
Ratio of polyunsaturated fatty acids to total fatty acids	ebi-a-GCST90092941	rs141469619	11	116714293	G	A	-0.179238	0.0209441	0.010139	1.10002e-17	115006	0.000636414	73.2368
Ratio of polyunsaturated fatty acids to total fatty acids	ebi-a-GCST90092941	rs1047964	11	117156893	T	G	0.154268	0.0201684	0.010066	1.99986e-14	115006	0.000508472	58.5061
Ratio of polyunsaturated fatty acids to total fatty acids	ebi-a-GCST90092941	rs2302263	11	64021821	T	C	-0.039263	0.00701116	0.088121	2.1e-08	115006	0.000272614	31.3603
Ratio of polyunsaturated fatty acids to total fatty acids	ebi-a-GCST90092941	rs12419462	11	27623309	A	G	-0.0306279	0.0047212	0.228758	8.69961e-11	115006	0.000365806	42.0845
Ratio of polyunsaturated fatty acids to total fatty acids	ebi-a-GCST90092941	rs174564	11	61588305	G	A	-0.121598	0.00415415	0.347009	2.39883e-188	115006	0.00739511	856.803
Ratio of polyunsaturated fatty acids to total fatty acids	ebi-a-GCST90092941	rs149402055	11	68525539	T	C	-0.0931948	0.014958	0.019716	4.70002e-10	115006	0.000337419	38.8176
Ratio of polyunsaturated fatty acids to total fatty acids	ebi-a-GCST90092941	rs6606731	12	109982578	A	T	-0.0281891	0.00503417	0.190943	2.1e-08	115006	0.000272564	31.3544
Ratio of polyunsaturated fatty acids to total fatty acids	ebi-a-GCST90092941	rs139974673	15	44027885	C	T	-0.102576	0.0125072	0.025916	2.39994e-16	115006	0.000584517	67.2611
Ratio of polyunsaturated fatty acids to total fatty acids	ebi-a-GCST90092941	rs7402939	15	99183876	C	T	-0.0236583	0.00413759	0.623528	1.09999e-08	115006	0.000284203	32.6937
Ratio of polyunsaturated fatty acids to total fatty acids	ebi-a-GCST90092941	rs261290	15	58678720	C	T	0.0280914	0.00418134	0.654648	1.80011e-11	115006	0.000392306	45.1345
Ratio of polyunsaturated fatty acids to total fatty acids	ebi-a-GCST90092941	rs56156922	16	56987369	C	T	0.0269447	0.00425208	0.32432	2.30001e-10	115006	0.000349037	40.1547
Ratio of polyunsaturated fatty acids to total fatty acids	ebi-a-GCST90092941	rs11644601	16	15172118	C	T	0.052633	0.00435714	0.296674	1.39991e-33	115006	0.00126719	145.917
Ratio of polyunsaturated fatty acids to total fatty acids	ebi-a-GCST90092941	rs72836561	17	41926126	T	C	-0.0873155	0.0113592	0.031481	1.50003e-14	115006	0.000513504	59.0853
Ratio of polyunsaturated fatty acids to total fatty acids	ebi-a-GCST90092941	rs9908820	17	73408819	G	A	-0.0285307	0.0044699	0.729127	1.7e-10	115006	0.000354124	40.7401
Ratio of polyunsaturated fatty acids to total fatty acids	ebi-a-GCST90092941	rs116843064	19	8429323	A	G	0.159327	0.0142266	0.01986	4.10015e-29	115006	0.00108939	125.421
Ratio of polyunsaturated fatty acids to total fatty acids	ebi-a-GCST90092941	rs283814	19	45389224	G	A	-0.0416285	0.00739827	0.922413	1.79999e-08	115006	0.000275221	31.6602
Ratio of polyunsaturated fatty acids to total fatty acids	ebi-a-GCST90092941	rs2081194	19	49263477	C	G	0.0281411	0.00415835	0.601332	1.29987e-11	115006	0.000398058	45.7965
Ratio of polyunsaturated fatty acids to total fatty acids	ebi-a-GCST90092941	rs1065853	19	45413233	T	G	-0.124284	0.00731831	0.080578	1.10002e-64	115006	0.0025015	288.404
Ratio of polyunsaturated fatty acids to total fatty acids	ebi-a-GCST90092941	rs6073958	20	44551855	C	T	-0.0533143	0.00497908	0.198745	9.3994e-27	115006	0.000995946	114.652
Ratio of saturated fatty acids to total fatty acids	ebi-a-GCST90092981	rs2642438	1	220970028	G	A	0.0465484	0.00446039	0.703828	1.69981e-25	115006	0.00094609	108.907
Ratio of saturated fatty acids to total fatty acids	ebi-a-GCST90092981	rs140584594	1	110232983	G	A	0.0523577	0.00456025	0.730075	1.59993e-30	115006	0.0011449	131.818
Ratio of saturated fatty acids to total fatty acids	ebi-a-GCST90092981	rs1260326	2	27730940	C	T	-0.0553075	0.00416082	0.604008	2.60016e-40	115006	0.00153399	176.686
Ratio of saturated fatty acids to total fatty acids	ebi-a-GCST90092981	rs6754311	2	136707982	C	T	-0.0266747	0.004603	0.264724	6.80002e-09	115006	0.000291924	33.5822
Ratio of saturated fatty acids to total fatty acids	ebi-a-GCST90092981	rs4918	3	186338382	C	G	-0.0233664	0.00425224	0.64282	3.89996e-08	115006	0.00026249	30.1954
Ratio of saturated fatty acids to total fatty acids	ebi-a-GCST90092981	rs1229984	4	100239319	C	T	0.145346	0.0123135	0.972541	3.69999e-32	115006	0.00121003	139.327
Ratio of saturated fatty acids to total fatty acids	ebi-a-GCST90092981	rs117733303	6	160922870	G	A	-0.102864	0.0150959	0.018512	9.49948e-12	115006	0.000403565	46.4303
Ratio of saturated fatty acids to total fatty acids	ebi-a-GCST90092981	rs3130290	6	32174957	C	T	0.0317416	0.00415606	0.603432	2.19989e-14	115006	0.000506936	58.3293
Ratio of saturated fatty acids to total fatty acids	ebi-a-GCST90092981	rs9468165	6	27557804	C	T	-0.0327152	0.00566069	0.512877	7.49998e-09	115006	0.000290345	33.4005
Ratio of saturated fatty acids to total fatty acids	ebi-a-GCST90092981	rs55730499	6	161005610	T	C	-0.0735112	0.0075208	0.079855	1.50003e-22	115006	0.000830038	95.537
Ratio of saturated fatty acids to total fatty acids	ebi-a-GCST90092981	rs1119695	7	10622390	G	A	-0.0299065	0.00536278	0.823111	2.5e-08	115006	0.000270342	31.0988
Ratio of saturated fatty acids to total fatty acids	ebi-a-GCST90092981	rs2980888	8	126507308	C	T	-0.0511102	0.00443961	0.698822	1.10002e-30	115006	0.00115108	132.531
Ratio of saturated fatty acids to total fatty acids	ebi-a-GCST90092981	rs295289	9	86446938	A	T	-0.0271039	0.00467108	0.256691	6.49995e-09	115006	0.000292672	33.6683
Ratio of saturated fatty acids to total fatty acids	ebi-a-GCST90092981	rs2495730	10	102361277	C	T	-0.0406095	0.00562953	0.155244	5.40008e-13	115006	0.000452266	52.0359
Ratio of saturated fatty acids to total fatty acids	ebi-a-GCST90092981	rs2792703	10	113931690	T	C	-0.0368602	0.00452677	0.719197	3.90032e-16	115006	0.000576193	66.3027
Ratio of saturated fatty acids to total fatty acids	ebi-a-GCST90092981	rs12412743	10	114045333	T	C	-0.0323084	0.00545879	0.16682	3.2e-09	115006	0.000304499	35.0292
Ratio of saturated fatty acids to total fatty acids	ebi-a-GCST90092981	rs603424	10	102075479	A	G	0.0508101	0.00535379	0.17386	2.29985e-21	115006	0.000782559	90.0679
Ratio of saturated fatty acids to total fatty acids	ebi-a-GCST90092981	rs964184	11	116648917	C	G	0.0407578	0.0059981	0.867233	1.10002e-11	115006	0.000401328	46.1728
Ratio of saturated fatty acids to total fatty acids	ebi-a-GCST90092981	rs102275	11	61557803	C	T	-0.0437478	0.0042558	0.349751	8.69961e-25	115006	0.000917975	105.668
Ratio of saturated fatty acids to total fatty acids	ebi-a-GCST90092981	rs73412716	12	112545197	T	G	-0.0451082	0.00816955	0.069268	3.40001e-08	115006	0.00026502	30.4865
Ratio of saturated fatty acids to total fatty acids	ebi-a-GCST90092981	rs473224	15	58737341	G	T	-0.0423304	0.00583455	0.853934	4.00037e-13	115006	0.000457479	52.6359
Ratio of saturated fatty acids to total fatty acids	ebi-a-GCST90092981	rs261290	15	58678720	C	T	-0.0485282	0.00428895	0.654648	1.10002e-29	115006	0.00111194	128.02
Ratio of saturated fatty acids to total fatty acids	ebi-a-GCST90092981	rs56017239	17	40989002	G	A	0.0605977	0.0110205	0.036382	3.79997e-08	115006	0.00026283	30.2345
Ratio of saturated fatty acids to total fatty acids	ebi-a-GCST90092981	rs35650232	19	49259973	G	T	-0.0313658	0.0051108	0.2217	8.40001e-10	115006	0.000327395	37.6641
Ratio of saturated fatty acids to total fatty acids	ebi-a-GCST90092981	rs1065853	19	45413233	T	G	0.0637474	0.00750926	0.080578	2.09991e-17	115006	0.000626236	72.0648
Ratio of saturated fatty acids to total fatty acids	ebi-a-GCST90092981	rs73045691	19	45440529	A	G	-0.0255452	0.00464241	0.304275	3.69999e-08	115006	0.000263207	30.2778
Ratio of saturated fatty acids to total fatty acids	ebi-a-GCST90092981	rs4810479	20	44545048	T	C	-0.0266002	0.0047008	0.750178	1.5e-08	115006	0.000278346	32.0198
Ratio of saturated fatty acids to total fatty acids	ebi-a-GCST90092981	rs2904552	22	18905964	T	C	-0.0436476	0.00684279	0.104382	1.79999e-10	115006	0.000353655	40.6862
Ratio of saturated fatty acids to total fatty acids	ebi-a-GCST90092981	rs738408	22	44324730	T	C	-0.0465313	0.004938	0.216534	4.40048e-21	115006	0.000771494	88.7934
Ratio of saturated fatty acids to total fatty acids	ebi-a-GCST90092981	rs5746641	22	18911733	C	T	-0.0700721	0.0101689	0.041832	5.50047e-12	115006	0.000412708	47.4826
Saturated fatty acid levels	ebi-a-GCST90092980	rs1002687	1	62963737	A	G	0.0824895	0.00425075	0.644739	6.90081e-84	115006	0.00326382	376.581
Saturated fatty acid levels	ebi-a-GCST90092980	rs660240	1	109817838	C	T	0.0315817	0.00495298	0.784707	1.79999e-10	115006	0.000353398	40.6565
Saturated fatty acid levels	ebi-a-GCST90092980	rs7551124	1	23785760	T	C	0.0382308	0.00614253	0.875392	4.79999e-10	115006	0.000336717	38.7369
Saturated fatty acid levels	ebi-a-GCST90092980	rs11895352	2	20367135	T	C	-0.0268626	0.00408233	0.475391	4.70002e-11	115006	0.000376353	43.2984
Saturated fatty acid levels	ebi-a-GCST90092980	rs4564803	2	21205502	T	G	-0.0494208	0.00483679	0.22818	1.69981e-24	115006	0.000906965	104.399
Saturated fatty acid levels	ebi-a-GCST90092980	rs1260326	2	27730940	C	T	-0.106394	0.00415713	0.604008	1.79887e-144	115006	0.00566318	654.997
Saturated fatty acid levels	ebi-a-GCST90092980	rs60960031	2	21530659	A	G	-0.0252819	0.00415331	0.40287	1.09999e-09	115006	0.000322085	37.053
Saturated fatty acid levels	ebi-a-GCST90092980	rs13389219	2	165528876	T	C	-0.0299221	0.00416596	0.392574	6.79986e-13	115006	0.000448372	51.5877
Saturated fatty acid levels	ebi-a-GCST90092980	rs900048	3	136218930	T	C	0.0263328	0.00449118	0.709503	4.49997e-09	115006	0.000298829	34.3768
Saturated fatty acid levels	ebi-a-GCST90092980	rs6854749	4	87968798	T	A	0.0320809	0.00508773	0.19799	2.90001e-10	115006	0.0003456	39.7592
Saturated fatty acid levels	ebi-a-GCST90092980	rs13108218	4	3443931	G	A	-0.0277641	0.00421205	0.615408	4.40048e-11	115006	0.000377655	43.4483
Saturated fatty acid levels	ebi-a-GCST90092980	rs11429307	5	55857025	GT	G	0.0339696	0.00518552	0.191495	5.70033e-11	115006	0.000373004	42.913
Saturated fatty acid levels	ebi-a-GCST90092980	rs3846661	5	74639178	G	A	0.0264602	0.0041581	0.397843	2e-10	115006	0.000351984	40.4938
Saturated fatty acid levels	ebi-a-GCST90092980	rs4704834	5	156443066	G	A	0.0372358	0.00424432	0.644043	1.69981e-18	115006	0.000668797	76.9658
Saturated fatty acid levels	ebi-a-GCST90092980	rs35603463	6	32531745	C	T	0.0286392	0.00488208	0.566982	4.49997e-09	115006	0.000299131	34.4116
Saturated fatty acid levels	ebi-a-GCST90092980	rs28383314	6	32587213	C	T	0.0385885	0.00419547	0.622949	3.69999e-20	115006	0.000735046	84.5954
Saturated fatty acid levels	ebi-a-GCST90092980	rs12208357	6	160543148	T	C	0.0507871	0.00799825	0.069994	2.19999e-10	115006	0.000350465	40.319
Saturated fatty acid levels	ebi-a-GCST90092980	rs10455872	6	161010118	G	A	-0.135458	0.00753874	0.078987	3.50026e-72	115006	0.00279946	322.853
Saturated fatty acid levels	ebi-a-GCST90092980	rs117733303	6	160922870	G	A	-0.237612	0.0150824	0.018512	6.4003e-56	115006	0.00215347	248.192
Saturated fatty acid levels	ebi-a-GCST90092980	rs632057	6	139834012	G	T	-0.0283876	0.00420727	0.627772	1.50003e-11	115006	0.000395698	45.5249
Saturated fatty acid levels	ebi-a-GCST90092980	rs55747707	7	73037366	A	G	-0.069736	0.00506719	0.203638	4.30031e-43	115006	0.00164416	189.397
Saturated fatty acid levels	ebi-a-GCST90092980	rs28601761	8	126500031	G	C	-0.0909348	0.00417008	0.420103	1.99986e-105	115006	0.00411774	475.515
Saturated fatty acid levels	ebi-a-GCST90092980	rs34120986	8	11689763	A	G	-0.0248578	0.00431627	0.371625	8.50002e-09	115006	0.000288312	33.1666
Saturated fatty acid levels	ebi-a-GCST90092980	rs2126259	8	9185146	C	T	0.0572679	0.00675706	0.899179	2.29985e-17	115006	0.000624188	71.8289
Saturated fatty acid levels	ebi-a-GCST90092980	rs139315015	8	19893297	G	A	-0.0840885	0.00661994	0.105286	5.70033e-37	115006	0.00140099	161.346
Saturated fatty acid levels	ebi-a-GCST90092980	rs10504255	8	59398461	A	G	-0.0282853	0.00431685	0.662977	5.70033e-11	115006	0.000373169	42.9319
Saturated fatty acid levels	ebi-a-GCST90092980	rs10810374	9	15306292	C	A	0.025975	0.00474004	0.248608	4.30002e-08	115006	0.000261044	30.0289
Saturated fatty acid levels	ebi-a-GCST90092980	rs2740488	9	107661742	C	A	-0.0363629	0.00462025	0.265318	3.50026e-15	115006	0.000538309	61.941
Saturated fatty acid levels	ebi-a-GCST90092980	rs11789603	9	107647019	T	C	0.0430623	0.00654812	0.108847	4.79954e-11	115006	0.000375904	43.2468
Saturated fatty acid levels	ebi-a-GCST90092980	rs2478236	10	94797973	A	G	-0.0251196	0.00415363	0.403819	1.5e-09	115006	0.000317915	36.5731
Saturated fatty acid levels	ebi-a-GCST90092980	rs117488242	10	5261832	G	A	-0.0407977	0.00630477	0.131672	9.70063e-11	115006	0.000363961	41.8722
Saturated fatty acid levels	ebi-a-GCST90092980	rs374209699	11	49104677	GT	G	0.0247591	0.00450756	0.358325	4e-08	115006	0.000262272	30.1703
Saturated fatty acid levels	ebi-a-GCST90092980	rs7118569	11	75526482	G	C	-0.0456634	0.00710267	0.090218	1.29999e-10	115006	0.000359266	41.3319
Saturated fatty acid levels	ebi-a-GCST90092980	rs964184	11	116648917	C	G	-0.145494	0.00599682	0.867233	5.00035e-130	115006	0.00509226	588.628
Saturated fatty acid levels	ebi-a-GCST90092980	rs141469619	11	116714293	G	A	0.164093	0.021499	0.010139	2.29985e-14	115006	0.000506294	58.2554
Saturated fatty acid levels	ebi-a-GCST90092980	rs102275	11	61557803	C	T	-0.0330544	0.00425489	0.349751	7.89951e-15	115006	0.000524486	60.3496
Saturated fatty acid levels	ebi-a-GCST90092980	rs7973253	12	109878115	G	A	0.0280507	0.00422919	0.367262	3.29989e-11	115006	0.000382372	43.9912
Saturated fatty acid levels	ebi-a-GCST90092980	rs76895963	12	4384844	G	T	-0.0896654	0.0158287	0.020559	1.5e-08	115006	0.000278944	32.0887
Saturated fatty acid levels	ebi-a-GCST90092980	rs7979473	12	121420260	G	A	-0.0279927	0.00421319	0.612985	3.10027e-11	115006	0.00038369	44.1428
Saturated fatty acid levels	ebi-a-GCST90092980	rs6602911	13	114547372	T	C	0.0262742	0.00423709	0.360074	5.60003e-10	115006	0.00033424	38.4517
Saturated fatty acid levels	ebi-a-GCST90092980	rs633695	15	58725839	G	A	0.0730728	0.00448889	0.292334	1.39991e-59	115006	0.00229887	264.988
Saturated fatty acid levels	ebi-a-GCST90092980	rs139974673	15	44027885	C	T	0.0958836	0.0128252	0.025916	7.70016e-14	115006	0.000485768	55.8924
Saturated fatty acid levels	ebi-a-GCST90092980	rs261290	15	58678720	C	T	-0.100722	0.00428768	0.654648	5.00035e-122	115006	0.00477534	551.819
Saturated fatty acid levels	ebi-a-GCST90092980	rs2000999	16	72108093	A	G	0.0284117	0.00519629	0.188603	4.60002e-08	115006	0.000259881	29.8951
Saturated fatty acid levels	ebi-a-GCST90092980	rs11076175	16	57006378	G	A	-0.0388432	0.00532819	0.178892	3.10027e-13	115006	0.000461902	53.1451
Saturated fatty acid levels	ebi-a-GCST90092980	rs2156552	18	47181668	T	A	0.0510402	0.00530578	0.821818	6.59933e-22	115006	0.000804001	92.5377
Saturated fatty acid levels	ebi-a-GCST90092980	rs77960347	18	47109955	G	A	0.196646	0.0177797	0.013234	1.99986e-28	115006	0.00106253	122.325
Saturated fatty acid levels	ebi-a-GCST90092980	rs8107974	19	19388500	T	A	-0.117425	0.0077144	0.075532	2.49977e-52	115006	0.00201058	231.691
Saturated fatty acid levels	ebi-a-GCST90092980	rs157592	19	45424514	C	A	0.0522227	0.00536898	0.185273	2.29985e-22	115006	0.000821973	94.6079
Saturated fatty acid levels	ebi-a-GCST90092980	rs142158911	19	11190534	A	G	-0.0598613	0.00637679	0.116703	6.20012e-21	115006	0.000765658	88.1212
Saturated fatty acid levels	ebi-a-GCST90092980	rs739320	19	49261368	C	T	-0.030032	0.00426087	0.606658	1.80011e-12	115006	0.000431781	49.678
Saturated fatty acid levels	ebi-a-GCST90092980	rs5112	19	45430280	G	C	0.0615391	0.00437616	0.533721	6.4998e-45	115006	0.00171652	197.746
Saturated fatty acid levels	ebi-a-GCST90092980	rs1883711	20	39179822	C	G	0.0794341	0.0119575	0.031197	3.10027e-11	115006	0.000383571	44.1292
Saturated fatty acid levels	ebi-a-GCST90092980	rs9616847	22	50868669	T	A	0.0231042	0.00419491	0.388308	3.59998e-08	115006	0.000263695	30.334
Total fatty acid levels	ebi-a-GCST90092987	rs822928	1	234873275	C	A	0.0240148	0.00410698	0.529646	5e-09	115006	0.00029721	34.1905
Total fatty acid levels	ebi-a-GCST90092987	rs1002687	1	62963737	A	G	0.096121	0.00425494	0.644739	5.39511e-113	115006	0.0044178	510.319
Total fatty acid levels	ebi-a-GCST90092987	rs660240	1	109817838	C	T	0.0406566	0.00495786	0.784707	2.39994e-16	115006	0.000584385	67.2459
Total fatty acid levels	ebi-a-GCST90092987	rs534417	1	23784965	G	A	0.0411587	0.00613897	0.875008	1.99986e-11	115006	0.000390699	44.9495
Total fatty acid levels	ebi-a-GCST90092987	rs4564803	2	21205502	T	G	-0.0616898	0.00484211	0.22818	3.50026e-37	115006	0.00140937	162.312
Total fatty acid levels	ebi-a-GCST90092987	rs60960031	2	21530659	A	G	-0.0281404	0.00415788	0.40287	1.29987e-11	115006	0.000398128	45.8046
Total fatty acid levels	ebi-a-GCST90092987	rs4299376	2	44072576	T	G	-0.0237985	0.00436123	0.676282	4.79999e-08	115006	0.00025885	29.7765
Total fatty acid levels	ebi-a-GCST90092987	rs1260326	2	27730940	C	T	-0.105845	0.0041617	0.604008	1.09901e-142	115006	0.00559297	646.832
Total fatty acid levels	ebi-a-GCST90092987	rs11895352	2	20367135	T	C	-0.0314202	0.00408682	0.475391	1.50003e-14	115006	0.000513692	59.1071
Total fatty acid levels	ebi-a-GCST90092987	rs1128249	2	165528624	T	G	-0.0287496	0.00417174	0.39204	5.50047e-12	115006	0.00041279	47.4921
Total fatty acid levels	ebi-a-GCST90092987	rs900048	3	136218930	T	C	0.0267285	0.00449699	0.709503	2.80001e-09	115006	0.00030708	35.3263
Total fatty acid levels	ebi-a-GCST90092987	rs13108218	4	3443931	G	A	-0.0352937	0.00421717	0.615408	5.79963e-17	115006	0.000608649	70.0398
Total fatty acid levels	ebi-a-GCST90092987	rs1471251	4	87976359	T	A	0.0263886	0.00418046	0.397122	2.69998e-10	115006	0.000346349	39.8453
Total fatty acid levels	ebi-a-GCST90092987	rs4860948	4	69340991	A	T	0.027714	0.00475389	0.244351	5.60003e-09	115006	0.000295428	33.9854
Total fatty acid levels	ebi-a-GCST90092987	rs11429307	5	55857025	GT	G	0.0345251	0.00519199	0.191495	2.90001e-11	115006	0.000384339	44.2175
Total fatty acid levels	ebi-a-GCST90092987	rs3846663	5	74655726	T	C	0.0320614	0.00420778	0.373928	2.49977e-14	115006	0.000504567	58.0566
Total fatty acid levels	ebi-a-GCST90092987	rs4704834	5	156443066	G	A	0.0446199	0.00424961	0.644043	8.69961e-26	115006	0.000957684	110.243
Total fatty acid levels	ebi-a-GCST90092987	rs12208357	6	160543148	T	C	0.054141	0.00800661	0.069994	1.39991e-11	115006	0.000397431	45.7244
Total fatty acid levels	ebi-a-GCST90092987	rs3869125	6	31221447	G	A	0.0493147	0.00827978	0.06513	2.59998e-09	115006	0.000308362	35.4738
Total fatty acid levels	ebi-a-GCST90092987	rs35603463	6	32531745	C	T	0.0323627	0.00488718	0.566982	3.50026e-11	115006	0.000381142	43.8496
Total fatty acid levels	ebi-a-GCST90092987	rs28383314	6	32587213	C	T	0.0434702	0.00419985	0.622949	4.19952e-25	115006	0.00093066	107.129
Total fatty acid levels	ebi-a-GCST90092987	rs632057	6	139834012	G	T	-0.0280219	0.00421166	0.627772	2.90001e-11	115006	0.00038477	44.2671
Total fatty acid levels	ebi-a-GCST90092987	rs117733303	6	160922870	G	A	-0.240616	0.0150981	0.018512	3.50026e-57	115006	0.00220356	253.978
Total fatty acid levels	ebi-a-GCST90092987	rs10455872	6	161010118	G	A	-0.132729	0.00754661	0.078987	2.99985e-69	115006	0.00268251	309.329
Total fatty acid levels	ebi-a-GCST90092987	rs55747707	7	73037366	A	G	-0.079882	0.00507363	0.203638	7.50067e-56	115006	0.00215082	247.886
Total fatty acid levels	ebi-a-GCST90092987	rs1561748	8	19733244	C	G	-0.0281558	0.00496733	0.267445	1.40001e-08	115006	0.000279285	32.1279
Total fatty acid levels	ebi-a-GCST90092987	rs2126259	8	9185146	C	T	0.0673835	0.00676492	0.899179	2.29985e-23	115006	0.000861959	99.2143
Total fatty acid levels	ebi-a-GCST90092987	rs328	8	19819724	G	C	-0.0955148	0.00676227	0.100282	2.70023e-45	115006	0.00173174	199.503
Total fatty acid levels	ebi-a-GCST90092987	rs2326077	8	59385919	T	C	-0.0293367	0.00431466	0.663245	1.10002e-11	115006	0.000401823	46.2298
Total fatty acid levels	ebi-a-GCST90092987	rs28601761	8	126500031	G	C	-0.0918787	0.00417493	0.420103	2.50035e-107	115006	0.00419359	484.31
Total fatty acid levels	ebi-a-GCST90092987	rs2721961	8	116657911	G	T	-0.0278844	0.00453925	0.280836	8.10009e-10	115006	0.000328013	37.7352
Total fatty acid levels	ebi-a-GCST90092987	rs11789603	9	107647019	T	C	0.0428367	0.00655585	0.108847	6.4003e-11	115006	0.000371101	42.694
Total fatty acid levels	ebi-a-GCST90092987	rs2740488	9	107661742	C	A	-0.0400585	0.00462571	0.265318	4.70002e-18	115006	0.000651672	74.9937
Total fatty acid levels	ebi-a-GCST90092987	rs4008004	9	15300968	A	C	0.0294412	0.00492491	0.221833	2.30001e-09	115006	0.000310641	35.7361
Total fatty acid levels	ebi-a-GCST90092987	rs2478236	10	94797973	A	G	-0.0245137	0.00415876	0.403819	3.79997e-09	115006	0.000302022	34.7442
Total fatty acid levels	ebi-a-GCST90092987	rs117488242	10	5261832	G	A	-0.0404616	0.00631255	0.131672	1.5e-10	115006	0.000357109	41.0836
Total fatty acid levels	ebi-a-GCST90092987	rs102275	11	61557803	C	T	-0.025204	0.00425977	0.349751	3.29997e-09	115006	0.000304308	35.0073
Total fatty acid levels	ebi-a-GCST90092987	rs964184	11	116648917	C	G	-0.17836	0.00600369	0.867233	5.99791e-194	115006	0.00761584	882.573
Total fatty acid levels	ebi-a-GCST90092987	rs141469619	11	116714293	G	A	0.192946	0.0215236	0.010139	3.10027e-19	115006	0.000698261	80.3589
Total fatty acid levels	ebi-a-GCST90092987	rs374209699	11	49104677	GT	G	0.0269175	0.00451273	0.358325	2.39999e-09	115006	0.000309269	35.5781
Total fatty acid levels	ebi-a-GCST90092987	rs72997616	11	75474195	A	C	-0.0507427	0.0070119	0.094062	4.60045e-13	115006	0.000455153	52.3683
Total fatty acid levels	ebi-a-GCST90092987	rs7973253	12	109878115	G	A	0.0270847	0.00423447	0.367262	1.6e-10	115006	0.000355611	40.9112
Total fatty acid levels	ebi-a-GCST90092987	rs7979473	12	121420260	G	A	-0.029351	0.00421845	0.612985	3.50026e-12	115006	0.000420762	48.4097
Total fatty acid levels	ebi-a-GCST90092987	rs76895963	12	4384844	G	T	-0.0897887	0.0158484	0.020559	1.5e-08	115006	0.000279017	32.097
Total fatty acid levels	ebi-a-GCST90092987	rs6602911	13	114547372	T	C	0.0293366	0.00424256	0.360074	4.70002e-12	115006	0.000415588	47.8141
Total fatty acid levels	ebi-a-GCST90092987	rs633695	15	58725839	G	A	0.0756255	0.00449467	0.292334	1.59993e-63	115006	0.00245557	283.096
Total fatty acid levels	ebi-a-GCST90092987	rs139974673	15	44027885	C	T	0.10206	0.0128418	0.025916	1.9002e-15	115006	0.000548909	63.1614
Total fatty acid levels	ebi-a-GCST90092987	rs261290	15	58678720	C	T	-0.101093	0.0042932	0.654648	1.30017e-122	115006	0.00479811	554.463
Total fatty acid levels	ebi-a-GCST90092987	rs11076175	16	57006378	G	A	-0.0441014	0.0053349	0.178892	1.39991e-16	115006	0.000593846	68.3352
Total fatty acid levels	ebi-a-GCST90092987	rs2000999	16	72108093	A	G	0.0305454	0.00520283	0.188603	4.30002e-09	115006	0.000299614	34.4671
Total fatty acid levels	ebi-a-GCST90092987	rs2156552	18	47181668	T	A	0.0569029	0.00531227	0.821818	8.99912e-27	115006	0.000996678	114.736
Total fatty acid levels	ebi-a-GCST90092987	rs77960347	18	47109955	G	A	0.217639	0.0178015	0.013234	2.29985e-34	115006	0.001298	149.47
Total fatty acid levels	ebi-a-GCST90092987	rs142158911	19	11190534	A	G	-0.0700869	0.0063832	0.116703	4.79954e-28	115006	0.00104718	120.556
Total fatty acid levels	ebi-a-GCST90092987	rs56322906	19	11346155	A	G	-0.0925886	0.0110731	0.035155	6.20012e-17	115006	0.000607564	69.9148
Total fatty acid levels	ebi-a-GCST90092987	rs142385484	19	50016759	T	C	-0.0332512	0.00581479	0.147429	1.09999e-08	115006	0.000284251	32.6993
Total fatty acid levels	ebi-a-GCST90092987	rs58542926	19	19379549	T	C	-0.139935	0.00776802	0.074379	1.50003e-72	115006	0.00281376	324.507
Total fatty acid levels	ebi-a-GCST90092987	rs157592	19	45424514	C	A	0.0668962	0.00537438	0.185273	1.39991e-35	115006	0.00134537	154.931
Total fatty acid levels	ebi-a-GCST90092987	rs739320	19	49261368	C	T	-0.0269937	0.00426515	0.606658	2.5e-10	115006	0.000348164	40.0543
Total fatty acid levels	ebi-a-GCST90092987	rs5112	19	45430280	G	C	0.0750365	0.00438056	0.533721	8.99912e-66	115006	0.00254483	293.412
Total fatty acid levels	ebi-a-GCST90092987	rs1883711	20	39179822	C	G	0.0880153	0.0119724	0.031197	1.99986e-13	115006	0.00046971	54.0439
Total fatty acid levels	ebi-a-GCST90092987	rs9616847	22	50868669	T	A	0.0239233	0.00420047	0.388308	1.2e-08	115006	0.00028197	32.4369
SNPs, single nucleotide polymorphisms; IVs, instrumental variables; Chr, chromosome; Pos, position; EA, effect allele; OA, other allele; SE, standard error; EAF, effect allele frequency; R2, coefficient of determination (linkage disequilibrium measure); F, F-statistic; FAs, Fatty acids

## Sheet: Table S3
Table S3. The pleiotropy analysis.
Exposure	Outcome	Egger_intercept	SE	pval
Monounsaturated fatty acid levels	NAFLD	0.0164	0.00787	0.051
Omega-3 fatty acid levels	NAFLD	0.0129	0.00966	0.189
Omega-6 fatty acid levels	NAFLD	0.0178	0.0112	0.118
Polyunsaturated fatty acid levels	NAFLD	0.0202	0.0109	0.069
Ratio of docosahexaenoic acid to total fatty acid levels	NAFLD	-0.00422	0.0146	0.776
Ratio of linoleic acid to total fatty acids	NAFLD	-0.000257	0.0172	0.988
Ratio of monounsaturated fatty acids to total fatty acids	NAFLD	0.000984	0.00742	0.895
Ratio of omega-3 fatty acids to total fatty acids	NAFLD	0.0128	0.0108	0.248
Ratio of omega-6 fatty acids to omega-3 fatty acids	NAFLD	-0.013	0.0129	0.324
Ratio of omega-6 fatty acids to total fatty acids	NAFLD	-0.0085	0.00853	0.325
Ratio of polyunsaturated fatty acids to monounsaturated fatty acids	NAFLD	-0.00772	0.00584	0.193
Ratio of polyunsaturated fatty acids to total fatty acids	NAFLD	-0.00971	0.00726	0.19
Ratio of saturated fatty acids to total fatty acids	NAFLD	-0.0145	0.0615	0.817
Saturated fatty acid levels	NAFLD	0.0162	0.00973	0.103
Total fatty acid levels	NAFLD	0.0127	0.00912	0.169
NAFLD non-alcoholic fatty liver disease, SE standard error
